# Supplementary material for: Study protocol for SFX-01 after subarachnoid haemorrhage (SAS): a multicentre randomised double-blinded, placebo controlled trial
Source: PubMed Central journal article supplement — BMJ Open. 2020 Mar 25;10(3):e028514. doi: 10.1136/bmjopen-2018-028514 (PMC7170552; doi:10.1136/bmjopen-2018-028514), 2020-03-25
Supplement: bmjopen-2018-028514.draft_revisions.pdf [file bmjopen-2018-028514.draft_revisions.pdf]

# BMJ Open

BMJ Open is committed to open peer review. As part of this commitment we make the peer review history of every article we publish publicly available.

When an article is published we post the peer reviewers' comments and the authors' responses online. We also post the versions of the paper that were used during peer review. These are the versions that the peer review comments apply to.

The versions of the paper that follow are the versions that were submitted during the peer review process. They are not the versions of record or the final published versions. They should not be cited or distributed as the published version of this manuscript.

BMJ Open is an open access journal and the full, final, typeset and author-corrected version of record of the manuscript is available on our site with no access controls, subscription charges or pay-per-view fees (<http://bmjopen.bmj.com>).

If you have any questions on BMJ Open's open peer review process please email [info.bmjopen@bmj.com](mailto:info.bmjopen@bmj.com)

# BMJ Open

## **A study protocol for SFX-01 After Subarachnoid haemorrhage (SAS): A multi-centre randomised double-blinded, placebo controlled trial**

|                               |                                                                                                                                                                                                                                                                                          |
|-------------------------------|------------------------------------------------------------------------------------------------------------------------------------------------------------------------------------------------------------------------------------------------------------------------------------------|
| Journal:                      | <i>BMJ Open</i>                                                                                                                                                                                                                                                                          |
| Manuscript ID                 | bmjopen-2018-028514                                                                                                                                                                                                                                                                      |
| Article Type:                 | Protocol                                                                                                                                                                                                                                                                                 |
| Date Submitted by the Author: | 13-Dec-2018                                                                                                                                                                                                                                                                              |
| Complete List of Authors:     | Zolnourian, Ardan; University of Southampton, Clinical Neuroscience; University Hospital Southampton NHS Foundation Trust, Galea, Ian; University of Southampton Faculty of Medicine, Experimental Neurology<br>Bulters, Diederik ; University Hospital Southampton NHS Foundation Trust |
| Keywords:                     | Randomised controlled trial, Subarachnoid haemorrhage, Nrf2, Sulforaphane, Delayed cerebral ischaemia                                                                                                                                                                                    |
|                               |                                                                                                                                                                                                                                                                                          |

SCHOLARONE™  
Manuscripts

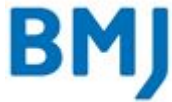

I, the Submitting Author has the right to grant and does grant on behalf of all authors of the Work (as defined in the below author licence), an exclusive licence and/or a non-exclusive licence for contributions from authors who are: i) UK Crown employees; ii) where BMJ has agreed a CC-BY licence shall apply, and/or iii) in accordance with the terms applicable for US Federal Government officers or employees acting as part of their official duties; on a worldwide, perpetual, irrevocable, royalty-free basis to BMJ Publishing Group Ltd ("BMJ") its licensees and where the relevant Journal is co-owned by BMJ to the co-owners of the Journal, to publish the Work in this journal and any other BMJ products and to exploit all rights, as set out in our [licence](#).

The Submitting Author accepts and understands that any supply made under these terms is made by BMJ to the Submitting Author unless you are acting as an employee on behalf of your employer or a postgraduate student of an affiliated institution which is paying any applicable article publishing charge ("APC") for Open Access articles. Where the Submitting Author wishes to make the Work available on an Open Access basis (and intends to pay the relevant APC), the terms of reuse of such Open Access shall be governed by a Creative Commons licence – details of these licences and which [Creative Commons](#) licence will apply to this Work are set out in our licence referred to above.

Other than as permitted in any relevant BMJ Author's Self Archiving Policies, I confirm this Work has not been accepted for publication elsewhere, is not being considered for publication elsewhere and does not duplicate material already published. I confirm all authors consent to publication of this Work and authorise the granting of this licence.

1  
2  
3 **A study protocol for SFX-01 After Subarachnoid haemorrhage**  
4 **(SAS): A multi-centre randomised double-blinded, placebo**  
5 **controlled trial**  
6  
7  
8  
9

10 **Date and version:** 16<sup>th</sup> May 2018, Version 7

11 Ardalan Zolnourian<sup>a,b</sup>, Ian Galea<sup>a, \*</sup>, Diederik Bulters<sup>a,b, \*</sup>

12  
13  
14 <sup>a</sup> Department of Neurosurgery, University Hospital Southampton, Tremona Road,  
15 Southampton, SO16 6YD

16  
17  
18 <sup>b</sup> Clinical Neurosciences, Faculty of Medicine, University of Southampton, Tremona  
19 Road,  
20 Southampton, SO16 6YD

21  
22 \* Joint senior authors

23  
24  
25 **Ardalan Zolnourian:** Principal investigator, University Hospital Southampton

26  
27 **Ian Galea:** Co-investigator, University of Southampton

28  
29 **Diederik Bulters:** Chief investigator, University Hospital Southampton

30  
31 **Statistician:** David Stone

32  
33 **Clinical trials coordinating centre:** The Clinical Trials Company Team

34  
35  
36 **Steering committee:** Diederik Bulters, Thomas Morris

37  
38  
39 **Corresponding author:** dbulters@nhs.net  
40  
41  
42  
43  
44  
45  
46  
47  
48  
49  
50  
51  
52  
53  
54  
55  
56  
57  
58  
59  
60

## **Abstract**

### **Introduction**

Subarachnoid haemorrhage from a ruptured cerebral aneurysm carries a high morbidity and mortality with subsequent negative impact on society and healthcare. Despite huge advances in techniques to secure the aneurysms, there has been little progress in the treatment of the deleterious effects of the haemorrhage.

Sulforaphane is an Nrf2 inducer with anti-oxidant and anti-inflammatory properties. It has been shown to improve clinical outcome in experimental models of SAH, but it is unstable. SFX-01 (Evgen Pharma) is a novel composition comprised of synthetic sulforaphane stabilised with  $\alpha$ -cyclodextrin complex. On ingestion, the complex releases sulforaphane making SFX-01 an ideal vehicle for delivery of sulforaphane.

### **Methods and analysis**

The objective of the study is to assess the safety, pharmacokinetics and efficacy of SFX-01. This is a prospective, multi-centre, randomised, double-blind placebo-controlled trial in patients aged 18-80 years with subarachnoid haemorrhage in the previous 48 hours. They will be randomised to receive SFX-01 or placebo twice daily for up to 28 days.

Pharmacokinetics will be assessed based on paired blood and CSF sulforaphane and its metabolites levels on day seven and in a subgroup of patients on hourly samples taken during six hours post-dosing on days one and seven. Pharmacodynamics will be assessed by haptoglobin and malondialdehyde levels, and maximum flow velocity of middle cerebral artery will be measured by transcranial Doppler ultrasound.

Clinical outcomes will be assessed at days 28, 90 and 180 using combination of mRS, GOSE, SAHOT, SF-36, BICRO-39 and CLCE-24. Further secondary outcomes include MRI at six months; quantitative susceptibility mapping will be used to measure iron deposition and volumetric T1 images for cortical volume.

### **Ethics and dissemination**

Appropriate ethical approval was obtained from the relevant research ethics committee. All the results and outcomes of the trial will be outlined and submitted for publication in a peer reviewed journal.

**Trial registration number:** 2014-003284-38 ; Pre-results

## **Strengths and limitations of this study**

- **SFX-01 is a novel complex of sulforaphane and cyclodextrin that can deliver high levels of sulforaphane in the clinical environment, offering the opportunity for the first time to reproduce the positive results of sulforaphane treatment in experimental models of subarachnoid haemorrhage.**
- **The trial is at low risk of bias due to placebo control and appropriate blinding.**
- **In addition to clear primary outcomes there are a wide range of secondary outcomes to probe the mechanisms underlying any efficacy of the treatment including novel and new outcome measures and MRI sequences.**
- **Although it is a multicentre trial, due to the complexity of its design, it has been limited to three centres to ensure high quality outcome measurement.**

## **Introduction**

Spontaneous Subarachnoid Haemorrhage (SAH) is a devastating cerebrovascular injury with an incidence of 9.1 per 100,000 population [1]. It affects around 7000 patients in the UK annually. Around 85% are due to ruptured intracranial aneurysms [2]. The incidence is age related peaking at 52 years. SAH carries a high overall mortality rate of up to 67% [3], and only half of the survivors are able to live independently [4]. It therefore has a high burden on society due to the loss of productivity and resources [5].

Conventionally following SAH, treatment is primarily directed to securing the aneurysm to prevent further re-bleeding. This however does nothing to ameliorate the morbidity and mortality due to the haemorrhage. The only approved treatment is nimodipine [6]. However, its effects are small and poor outcome remains a significant problem [7]. Moreover, even in survivors considered to have made a good recovery, neurocognitive deficits are common leading to extensive problems with social reintegration and functioning in the workplace [5].

The mechanism underlying poor outcome is multifactorial. A significant component is due to secondary injury from oxidative stress, inflammation [8], spreading depolarisation [9], macroscopic cerebral vasospasm [10] and microcirculatory disturbance [11]. The common factor is that they are initiated by extracellular haemoglobin (Hb) released as red blood cells in the clot lyse. This results in direct neurotoxicity, increased oxidative stress and further injury [12].

Sulforaphane (SFN) is known to upregulate the nuclear factor erythroid 2-related factor 2 (Nrf2) pathway. Nrf2 is a redox-sensitive transcription factor that binds to a specific DNA site, the anti-oxidant response element, upstream of genes encoding detoxifying and anti-oxidant enzymes [13] [14]. Some of these enzymes include glutathione S-transferases (GSTs), NAD(P)H-quinone oxidoreductase 1 (NQO1) and haem oxygenase 1 (HO-1) [13]. During physiological conditions Nrf2 is bound to the Kelch-like ECH associated protein 1 (KEAP1) in the cytoplasm. In response to stress such as SAH, Nrf2 is released from KEAP1 and then translocates to the nucleus leading to enhanced gene transcription [15].

1  
2  
3  
4 Nrf2 also upregulates haptoglobin (Hp), an acute phase glycoprotein found in plasma  
5 [16], as well as cerebrospinal fluid (CSF) [17]. Hp is part of an important Hb  
6 scavenging pathway after SAH. It tightly binds to free Hb, and this Hb-Hp complex is  
7 taken up by CD163-positive macrophages [18]. This pathway is saturated after SAH  
8 [17] and upregulation of Hp represents a possible therapeutic avenue [19]. Nrf2 also  
9 regulates degradation of red blood cells, and metabolism of haem and iron through  
10 transcriptional upregulation of CD36 [20] [20], haemopexin [21], HO-1 [22] and  
11 ferritin [23].

12  
13 Nrf2 is expressed in the central nervous system (CNS) and is upregulated in response  
14 to inflammation and cerebral insults [24]. Nrf2 knockout is associated with a more  
15 pronounced inflammatory response *in vitro* [25] and *in vivo* [26], and the increased  
16 inflammatory response is associated with more brain oedema, cell death and poorer  
17 neurological recovery [27]. SFN increases HO-1, NQO1, and GST- $\alpha$ 1 levels and  
18 reduces IL-1 $\beta$ , IL-6, and TNF- $\alpha$  [28]. It leads to a reduction in vasospasm and  
19 improves neurological recovery [26] [29].  
20  
21

22  
23 SFN has a relatively short half-life rendering it impractical for clinical use. SFX-01  
24 (Evgen Pharma) is a novel new agent comprising SFN complexed with cyclodextrin  
25 which is suitable for clinical use. On ingestion, SFN is released from the cyclodextrin  
26 and is an effective method to deliver SFN. In two Phase I trials (NCT01948362,  
27 NCT02055716) no serious adverse events were reported in healthy volunteers. Here  
28 we describe the protocol for a phase II trial of SFX-01 in patients who have suffered a  
29 SAH.  
30

## 31 **Objectives**

32  
33 The objective of the study is to assess the safety, pharmacokinetics and efficacy of  
34 SFX-01.  
35  
36

## 37 **Methods**

### 38 ***Trial design***

39  
40 This is a prospective, double-blind, parallel group, randomised controlled trial  
41 comparing SFX-01 (300 mg) taken orally as capsules or as a suspension via a  
42 nasogastric tube (NG) twice-daily for up to 28 days *versus* placebo in patients with  
43 SAH within 48 hours of enrolment.  
44  
45  
46  
47  
48

49 The treatment window was selected based on clinical and biochemical criteria. After  
50 SAH red blood cells in the subarachnoid space lyse and gradually release Hb. This  
51 lysis takes time and initially any free haemoglobin is bound by Hp. Only with  
52 progressive Hb accumulation do levels of free Hb rise with the most marked increase  
53 occurring after three days [30]. Clinically delayed cerebral ischaemia (DCI) is only  
54 seen after three days. Therefore, initiation of treatment should ideally occur within the  
55 first 72 hours, to allow more time for Nrf2 pathway activation and expression of its  
56 transcriptome. However not all patients present and/or are diagnosed immediately.  
57 Since a local audit at the main study neurosurgical centre showed that most patients  
58 are admitted within 48 hours, initiation of treatment within 48 hours was established  
59  
60

as an inclusion criterion, striking the best compromise between the practicality of study recruitment and the need to start treatment early.

Detailed pharmacovigilance will inform the safety of SFX-01. Pharmacokinetics will be determined by measurement levels of SFN and its metabolites in CSF and blood at day seven in all patients, and a more detailed profile will be obtained in a subgroup of 12 patients who will have hourly blood and CSF samples for six hours after dosing on days one and seven. Pharmacodynamics will be assessed with blood Hp and malondialdehyde (MDA) levels, and middle cerebral artery (MCA) flow velocity as measured on transcranial Doppler (TCD) ultrasound as an estimate of large cerebral artery spasm. Longer term outcome will be assessed using validated outcome scales, at day 28 using Modified Rankin Scale (mRS) ([31] [32] [33] ), Glasgow Outcome Score (GOSE) [34][35] and the SAH Outcome Tool (SAHOT) [36] as well as at day 90 and 180 using the mRS, GOSE, SAHOT, Brain Injury Community Rehabilitation Outcome Scales (BICRO-39) [37] and the Check List for Cognitive and Emotional consequences following stroke (CLCE-24) [38].

### ***Patient and public involvement***

The study was developed with the assistance of the Wessex Subarachnoid Haemorrhage Support Group. The research team met with members on several occasions for research priority setting, trial design, and development of outcome scales. At an early priority setting session the long-term symptoms from the haemorrhage were identified as the main priority for research and medical management preferred over surgical interventions. As a result, a proposal for a trial was made which was subsequently discussed to obtain views on the individual study interventions and how to minimise inconvenience to patients. Options for consent were also discussed and patients helped develop this process and contributed to our patient information sheets. Over two separate meetings the main symptoms after SAH were identified and developed into SAHOT, the first SAH specific outcome scale, utilised in this study. Upon completion of the trial participants will be informed of the results which will also be distributed through the Wessex Subarachnoid Haemorrhage Support Group.

### ***Study setting***

This is a multicentre study conducted in regional neurosciences centres with specialist services to treat aneurysmal SAH. Patients will be identified at referral to the admitting neurosurgical or neurointensive care units. After informed consent, dosing and study interventions will occur in the neurosciences centre until patients are discharged to either home or their local hospitals. There are three recruiting centres; University Hospital Southampton, Royal Infirmary of Edinburgh and the Royal London Hospital. Upon discharge, follow-up may take place in clinic, or at visits to district general hospitals and rehabilitation centres, or patients' residences.

## **Eligibility Criteria**

### ***Inclusion criteria***

1. Patients with radiological evidence of spontaneous aneurysmal SAH



2. Fisher grade 3 or 4 on CT
3. Definitive treatment of aneurysm has not been ruled out
4. Previously living independently
5. In the opinion of the investigator, the delay from ictus to randomisation and initiation of trial medication will not exceed 48 hours
6. Aged 18 to 80 years
7. In the opinion of the investigator it will be possible to obtain Informed Consent from the Patient, Personal Legal Representative or Professional Legal representative within 24 hours of first dose

### ***Exclusion criteria***

1. Traumatic SAH
2. Fisher grade 1 or 2
3. SAH diagnosed on Lumbar puncture (LP) with no evidence of blood on CT
4. Decision not to treat aneurysm has been made
5. Plan to withdraw treatment
6. Significant kidney disease as defined as plasma creatinine  $\geq 2.5$ mg/dL (221  $\mu$ mol/l)
7. Liver disease as defined as total bilirubin  $\geq 2$ -fold the upper limit of normal, as measured by the local laboratory
8. Females who are pregnant or lactating
9. Participants enrolled in another interventional research trial in the last 30 days
10. Patients for whom it is known, at the time of screening, that clinical follow-up will not be feasible
11. Patients unwilling to use two forms of contraception (one of which being a barrier method) for 90 days (men) or 30 days (women) after the last trial medication dose
12. Known hypersensitivity to any component of a SFN containing product including broccoli

Recruitment is limited to Fisher grade 3 and 4 SAH. These patients represent the majority of aneurysmal SAH. They have a higher volume of haemorrhage with a poorer outcome and more delayed neurological deficits [39]. They are therefore mechanistically and clinically expected to derive greatest benefit from SFX-01.

Inclusion of patients with unsecured aneurysms would risk a high incidence of rebleeding in the study. Rebleeding is associated with exceedingly bad outcomes [40], masking any effect from SFX-01. However, since not all aneurysms are secured within 48 hours, there is no requirement for the aneurysm to have been secured prior to enrolment. Instead patients in whom treatment of the aneurysm has been ruled out due to poor clinical status will be excluded.

Although there are no known risks to kidney or liver, due to the relative inexperience with SFX-01 in humans, patients with liver or kidney problems are excluded.

### **Intervention**

#### ***Trial medication***

1  
2  
3 SFX-01 (active 300 mg capsule) or placebo (cyclodextrin only capsule) will be taken  
4 orally or as a suspension via a nasogastric tube (NG) twice daily for up to 28 days.  
5

6  
7 Animal studies in ischaemic stroke, intracerebral haemorrhage and SAH have all used  
8 5 mg/kg dose of SFN in rodents [26] [41] [42] [43]. Conversion of animal doses to  
9 humans using body surface area, as has been widely recommended [44] [45], yields a  
10 human dose of 50 mg SFN. This is equivalent to 300 mg of SFX-01 containing 46.15  
11 mg of SFN. In the clinical studies conducted to date, SFX-01 has been shown to be  
12 well tolerated at doses of 600mg once daily and 300mg twice daily with no serious  
13 adverse effects.  
14

### 15 16 ***De-escalation from the trial regimen***

17  
18 In the event of tolerability problems whilst the patient is in the neurosurgical centre,  
19 the Investigator will assess whether simple measures to ease the effects of the adverse  
20 event(s) may be implemented (i.e. antacid in the case of GI irritation or anti-emetic in  
21 the event of nausea).  
22

23 The investigator will also assess whether or not the adverse event(s) could be related  
24 to the trial medication and severe enough to warrant a dose frequency reduction. In  
25 the first instance the investigator may consider missing one dose. If a dose frequency  
26 reduction is warranted, from that point onwards the second dose of the day will be  
27 omitted; a dose frequency increase back to twice daily will not be permitted.  
28

29  
30 If tolerability problems continue then the investigational medication will be stopped;  
31 patients will continue in the study and complete the study visits. The staged dose  
32 frequency de-escalation (dropping to once daily) will not be carried out after  
33 discharge from the neurosurgical centre; if tolerability problems occur after discharge,  
34 medication will be stopped; patients will continue in the study and complete the study  
35 visits in accordance with the schedule of assessments.  
36

### 37 38 ***Treatment compliance***

39  
40 Compliance with treatment will be recorded during the inpatient hospital stay by  
41 health care professionals and/or a member of the research team. On discharge to the  
42 usual residence, responsibility for this is transferred to the patient or their Personal  
43 Legal Representative, aided by detailed instructions. In the event of discharge to a  
44 rehabilitation unit or patient local hospital, written instructions will be provided on  
45 discharge and verbal communication with the clinical team will ensure compliance.  
46  
47

48 All patients will be discharged with a patient diary which will be filled in and  
49 collected at day 28. Compliance will be further monitored by drug reconciliation.  
50 Patients will be asked to return the medication bottle and any residual contents at the  
51 day 28 visit. At this time any residual tablets will be counted and recorded.  
52  
53

### 54 55 ***Concomitant treatment***

56 There are no known drug interactions, and participation in the trial will not alter  
57 routine treatment of SAH. Participation in other interventional research studies will  
58 not be allowed until after the last follow up visit.  
59  
60

## **Outcomes**

### **Primary end-points**

#### ***Safety***

To evaluate the safety of up to 28 days of SFX-01 dosed at up to an equivalent of 92mg SFN per day.

Prior to the start of this study, the trial medication had only been used in healthy individuals and not in a patient population. Therefore safety is one of the main objectives of this study. This is evaluated through routine tests (full blood count, urea and electrolytes, coagulation screen, liver function tests, and urine microscopy) at baseline, post-dose, day seven and day 28 as well as close monitoring of patients for any side-effects or adverse events.

#### ***Pharmacokinetic***

To detect the presence of SFN and its metabolites in CSF and blood.

Animal models have shown that SFN crosses the blood-brain barrier and can therefore be detected in the brain [46] [47] There is some variation in the levels achieved in these studies, and it has not been studied in humans. All patients will have a paired CSF/blood sample taken at seven days post-ictus. This will be via a LP unless the patient has an external ventricular drain (EVD) for their clinical care in which case it will be obtained from the EVD. In addition, up to 12 patients with an EVD will be asked to consent to hourly CSF samples for six hours after dosing on days one and seven.

#### ***Vasospasm***

To determine if a minimum of seven days treatment with SFX-01 reduces MCA peak flow velocity following SAH.

TCD ultrasound will be used to measure the MCA, ICA and ECA maximum flow velocity and the Lindegaard ratio will be calculated. TCDs will be performed on alternate daily basis including at baseline. They will be performed for at least seven days or until no longer clinically indicated. Blood flow velocity is measured in cm/second and is inversely related to the luminal diameter of the vessel. The greater this value the more likely the degree of narrowing or spasm in the vessel. It has a good predictive value for DCI. A recent systematic review and meta-analysis, which pooled data from 2870 patients, showed a sensitivity of 90%, specificity of 71%, and negative and positive predictive values of 92% and 57% respectively [48].

### **Secondary end-points**

#### ***Pharmacodynamic***

#### ***CSF and blood – Haptoglobin and Malondialdehyde***

1  
2  
3  
4 Hp represents a major Hb detoxification pathway and is upregulated by Nrf2. MDA is  
5 a measure of oxidative stress. Hp and MDA will be measured in blood at baseline,  
6 day seven and day 28 and in CSF on day seven. A local audit at the main study  
7 neurosurgical centre showed that approximately 1/3 of patients have an EVD sited as  
8 part of their routine clinical care to treat hydrocephalus. In these patients additional  
9 samples will be obtained. This will allow investigation of the temporal profile of Hp  
10 level and oxidative stress. Additionally, there will be exploratory investigations using  
11 proteomics, transcriptomics and genomics using CSF and blood samples.  
12  
13

### 14 ***MRI – iron and brain volume***

15  
16  
17 All patients will have magnetic resonance imaging (MRI) 180 days after SAH. Brain  
18 volume on T1 sequences will be measured, since this has been shown to correlate  
19 with outcome [49]. Cortical iron content will be assessed using quantitative  
20 susceptibility mapping after susceptibility weighted MR imaging, which  
21 predominantly measures siderotic iron deposits [50]. Iron is a major component of  
22 Hb, and it is unknown what effects SFX-01, SFN or increased Hp binding of Hb may  
23 have on the downstream iron pathway.  
24  
25

### 26 ***Clinical outcome***

- 27  
28  
29  
30  
31  
32  
33  
34  
35  
36  
37  
38  
39  
40  
41  
42
- mRS at seven days, discharge, 28, 90 and 180 days.
  - Incidence of DCI defined as a new focal deficit or reduction in GCS (by two points or more) if not explained by other causes (i.e. re-bleed, hydrocephalus, seizure, meningitis, sepsis or hyponatraemia) [51]
  - Incidence of new cerebral infarct on CT or MRI
  - Institution of hypertensive therapy for presumed DCI
  - SF-36 quality of life survey at 28, 90 & 180 days
  - CLCE-24 and BICRO-39 at 90 & 180 days
  - SAHOT and GOSE at 28, 90 & 180 days
  - Length of acute hospital stay
  - Discharge destination

43  
44  
45  
46  
47  
48  
49  
50  
51  
52

A number of measures of efficacy have been selected reflecting the most common stroke outcome assessment (mRS), the most common brain injury assessment (GOSE), the most common quality of life survey (SF-36) and the only SAH specific outcome tool [36] to determine the most sensitive tool and make estimates of effect size. SAHOT includes 56 items dealing with cognitive, physical, and behavioural/psychological consequences of SAH, developed in a SAH focus group by patients and experts in the field. This outcome tool has been validated and proposed as a more sensitive and responsive tool in SAH [36].

53  
54  
55  
56  
57  
58  
59  
60

A number of short term patient outcomes related to the incidence of DCI are included (incidence of infarction, and institution of hypertensive therapy). DCI is a serious complication following SAH and responsible for significant secondary injury [10]. Several simple outcomes including length of stay and discharge destination that have been associated with outcome [52] are also included in the event any patients are lost to longer term follow up.

## Schedule of assessments

| Time points <sup>1</sup>                      | D 0-2 | D 1-3<br>(12-24<br>post-<br>dose) | Ongoing<br>assessment<br>(Alternate days) <sup>6</sup><br>(+/-1) | D 7<br>(+/-1) | Discharge<br>(-2) | D 28<br>(-6/+2) | D 90<br>(+/-14) | D 180<br>(+/- 28) |
|-----------------------------------------------|-------|-----------------------------------|------------------------------------------------------------------|---------------|-------------------|-----------------|-----------------|-------------------|
| <b>Study procedures</b>                       |       |                                   |                                                                  |               |                   |                 |                 |                   |
| Consent                                       | X     |                                   |                                                                  |               |                   |                 |                 |                   |
| Inclusion/exclusion                           | X     |                                   |                                                                  |               |                   |                 |                 |                   |
| WFNS grading                                  | X     |                                   |                                                                  |               |                   |                 |                 |                   |
| IMP treatment                                 | X     |                                   |                                                                  |               |                   |                 |                 |                   |
| Safety bloods <sup>2</sup>                    | X     | X                                 | X                                                                | X             | X                 | X               |                 |                   |
| Safety urine                                  | X     |                                   |                                                                  | X             | X                 | X               |                 |                   |
| Lipid profile                                 | X     |                                   |                                                                  | X             | X                 | X               |                 |                   |
| Coagulation screen                            |       |                                   |                                                                  |               |                   |                 |                 |                   |
| TCD readings <sup>3</sup>                     |       | X                                 | X                                                                | X             |                   |                 |                 |                   |
| HP, MDA (Blood/CSF) <sup>4</sup>              | X     |                                   |                                                                  | X             |                   | X               |                 |                   |
| SFN & metabolites<br>(Blood/CSF) <sup>5</sup> |       |                                   |                                                                  | X             |                   |                 |                 |                   |
| mRS                                           |       |                                   |                                                                  | X             | X                 | X               | X               | X                 |
| GOSE                                          |       |                                   |                                                                  |               |                   | X               | X               | X                 |
| SAHOT                                         |       |                                   |                                                                  |               |                   | X               | X               | X                 |
| SF-36                                         |       |                                   |                                                                  |               |                   | X               | X               | X                 |
| BICRO-39                                      |       |                                   |                                                                  |               |                   |                 | X               | X                 |
| CLCE-24                                       |       |                                   |                                                                  |               |                   |                 | X               | X                 |
| MRI                                           |       |                                   |                                                                  |               |                   |                 |                 | X                 |

- 1- Ictus is defined as the onset of symptoms/haemorrhage and is referred to as day 0.
- 2- Safety bloods include: Biochemistry: Sodium, Potassium, Urea, Creatinine, Glucose, Calcium, Total Bilirubin, Alkaline Phosphatase, Alanine Transaminase, Albumin, C-Reactive Protein, and Haematology including Haemoglobin, White Blood Cell Count, Neutrophils (Absolute), Lymphocytes (Absolute), Platelets. These will be done at least on alternate days until no longer clinically indicated.
- 3- TCDs are performed at baseline before day 3 and will be repeated on alternate daily basis until at least day 7 or where clinically indicated.
- 4- HP and MDA will be assayed in both CSF and blood at baseline, where possible i.e if patient has an EVD fitted this will be measured in the CSF and blood at baseline as well as every other day until EVD is removed. All patients will have HP and MDA assayed on either a LP or EVD sample on day 7.
- 5- SFN and its metabolites will be measured on day 7 in all patient with paired blood and CSF (LP or EVD sample).
- 6- These assessments will be done on every other day basis with a +/-1 window. They will be carried on until discharge or up to when it is clinically required.

## Sample Size

No formal sample size calculation has been carried out; the power associated with a sample size of 90 is based on the following assumptions:

- The error probability for the Type I error should not exceed 5% for a one-sided test;
- The primary endpoint will be compared between treatment groups by means of a t-test
- The mean maximum MCA flow velocity for patients treated with SFX-01 is estimated as 175 cm/s and

- The standard deviation of maximum MCA flow velocity is 50 cm/s

Under these assumptions 90 patients will give 80% power to detect a difference in maximum MCA velocity which is approximately half of the standard deviation of the mean value. The standard deviation was assumed to be approximately 30% of the mean value.

## **Recruitment**

Patients with SAH who present to the clinical centres and meet the above criteria will be considered for recruitment. The inclusion and exclusion criteria reflect national practice. Patients will be identified by the treating clinical team at the time of referral, admission or daily medical handover.

## **Assignment of intervention**

### ***Randomisation and blinding***

Patients will be randomised in a 1:1 ratio to the active or placebo arm. Randomisation is stratified using the most recent World Federation of Neurosurgical Societies (WFNS) grade [53] prior to randomization. Patients in different WFNS groups will have significantly different outcomes [54] and imbalance between treatment arms risks treatment allocation bias.

All treatment packs will be otherwise identical in appearance. Placebo capsules will be identical and contain cyclodextrin making the contents indistinguishable should they be opened either inadvertently or for the purposes of NG administration. Patients will be randomised to one of the treatment groups by allocation of the appropriate, sequentially numbered treatment pack. The treatment packs will be pre-numbered according to a block balanced randomisation code with a ratio of 1:1 by a blinded third party. They will be selected as per WFNS grading by a member of a research team from pharmacy.

### ***Unblinding***

The Pharmacy will receive a sealed envelope containing the identity of each trial medication bottle. An envelope may be opened only in the case of a serious adverse event and only when it is essential to the subsequent management of the patient. The independent trial centre will be responsible for breaking codes for regulatory submissions of Suspected Unexpected Serious Adverse Reactions (SUSARs), thereby maintaining the overall confidentiality of the code breaks. If the code is broken the data for that patient will be excluded from the Per Protocol Population analysis but included in the Intention to Treat Analysis. They will continue in the study and complete the study visits in accordance with the study visit schedule.

## **Data collection and management**

Data collection will be performed by Good Clinical Practice-trained members of the research team. Study specific training and additional training in disease specific

questionnaires will be provided. The data will be entered into a secure electronic case report form.

### ***Statistical analysis***

The following populations will be considered for the analysis:

- Intention-to-Treat population (ITT): all randomised patients who receive at least one dose of study medication and with any post-dose efficacy evaluations. Patients where the time from ictus to admission is unknown are to be considered as part of the ITT population
- Per-protocol population (PPP): The Per Protocol Population (for Primary analysis) will be considered to be those patients in the ITT population that have been dosed for a minimum to day seven post ictus without any major protocol violations (i.e. wrong inclusions, etc.).
- Safety population: all randomised patients who have taken at least one dose of study medication.

The final full statistical analysis plan will be published prior to unblinding.

### ***Monitoring***

A data safety monitoring board (DSMB) has been set-up to monitor safety aspect of the trial throughout. A steering committee (comprising the Chief Investigator and the sponsor's Chief Medical Officer) will receive and review the reports from DSMB, and take action as appropriate. The DSMB plan to hold an initial meeting after recruitment of 20 patients who will have completed seven days of trial medication and if there are no safety concerns, will allow patients to be dosed for up to 28 days and allow patients to be discharged to other hospitals or home with the trial drug. The DSMB will also meet if there are any SUSARs or if two patients have had an increase in the grading of the severity of adverse events.

Recruitment will stop once the target has been reached or if DSMB will deem the study or trial drug to be associated with a significant number of adverse events compared to the normal patient population. The recruitment target is set to a minimum of 90 patients between three centres in the United Kingdom. Up to 120 patients may be recruited in order to allow for withdrawals and deaths.

### ***Adverse events reporting***

Adverse events, adverse drug reactions and serious adverse events (SAE) will be accurately documented. SAEs will be reported within 24 hours of awareness. Pregnancies occurring during the study must be reported immediately and monitored closely.

## **Ethical considerations and Informed Consent**

### ***Consent procedures and emergency dosing***

1  
2  
3 Most patients with acute SAH present with either severe headache or altered level of  
4 consciousness. Many will lack capacity with no legal representative immediately  
5 available. SAH is an acute emergency and any benefit from SFX-01 is likely to be  
6 greatest the earlier it is administered. The study has therefore been granted ethical  
7 permission to obtain baseline blood testing and administer two doses of trial drug  
8 without consent if the patient is lacking in capacity and no legal representative is  
9 available. If no consent can be obtained at that point, the patient will be withdrawn  
10 from the study.  
11  
12

13 Consent will be obtained in one of three scenarios:

- 14 1- Patients with capacity
- 15 2- Patients without capacity, but with a relative or next of kin available  
16 immediately in person
- 17 3- Patients without capacity and no relative or next of kin immediately available  
18 in person. Professional legal representative will be approached.  
19  
20  
21  
22

### 23 ***Re-Consent***

24 This must take place in two different scenarios:

- 25 1- Where patients regain capacity they must be re-consented.
- 26 2- Where patients have been consented through a professional legal  
27 representative, after which time either patient has regained capacity or the next  
28 of kin has become available.  
29  
30  
31

### 32 **Discussion**

33 There is mounting evidence for the role of the Nrf2 pathway in outcome after SAH.  
34 SFN upregulates Nrf2 expression and improves outcome in animal models. SFX-01  
35 represents an exciting and novel way to deliver SFN to patients SAH with the  
36 potential to improve their lives.  
37  
38  
39

40 This trial will investigate the safety, pharmacokinetics and pharmacodynamics of  
41 SFX-01 after SAH. If successful it may deliver long-term benefit to patients who have  
42 suffered SAH and provide new hope to a group of patients characterised by complex  
43 neurocognitive problems and disability.  
44  
45

### 46 **Footnotes**

47 **Authors' contributions:** DB conceived the trial. AZ, IG and DB were all involved in  
48 the design of the study and its setup. AZ and DB wrote the study protocol. DB  
49 managed the recruitment of other centres. IG and DB reviewed the protocol  
50 manuscript and approved the final version.  
51  
52

53 **Funding:** This study is sponsored by EvgenPharma.

54 **Competing interests:** None declared.  
55  
56

57 **Ethics approval:** South central Research Ethics Committee, Hampshire A, UK.

58 **Word count:** 4192  
59  
60



## References

- 1 de Rooij NK, Linn FHH, van der Plas JA, *et al.* Incidence of subarachnoid haemorrhage: a systematic review with emphasis on region, age, gender and time trends. *J Neurol Neurosurg Psychiatry* 2007;**78**:1365–72. doi:10.1136/jnnp.2007.117655
- 2 Van Gijn J, Rinkel GJE. Subarachnoid haemorrhage: Diagnosis, causes and management. *Brain*. 2001. doi:10.1093/brain/124.2.249
- 3 Nieuwkamp DJ, Setz LE, Algra A, *et al.* Changes in case fatality of aneurysmal subarachnoid haemorrhage over time, according to age, sex, and region: a meta-analysis. *Lancet Neurol* 2009;**8**:635–42. doi:10.1016/S1474-4422(09)70126-7
- 4 Kirkpatrick P, Lindsay K, Shaw M, *et al.* *National Study of Subarachnoid Haemorrhage*. 2006.
- 5 Rivero-Arias O, Gray A, Wolstenholme J. Burden of disease and costs of aneurysmal subarachnoid haemorrhage (aSAH) in the United Kingdom. *Cost Eff Resour Alloc* 2010;**8**:1–12. doi:10.1186/1478-7547-8-6
- 6 Pickard JD, Murray GD, Illingworth R, *et al.* Effect of oral nimodipine on cerebral infarction and outcome after subarachnoid haemorrhage : British aneurysm nimodipine trial. *Bmj* 1989;**298**:636–42. doi:10.1136/bmj.298.6674.636
- 7 Dorhout Mees SM, Rinkel GJ, Feigin VL, *et al.* Calcium antagonists for aneurysmal subarachnoid haemorrhage. *Cochrane Database Syst Rev* Published Online First: 2007. doi:10.1002/14651858.CD000277.pub3
- 8 Fassbender K, Hodapp B, Rossol S, *et al.* Inflammatory cytokines in subarachnoid haemorrhage : association with abnormal blood flow velocities in basal cerebral arteries Inflammatory cytokines in subarachnoid haemorrhage : association with abnormal blood flow velocities in basal cerebral arteries. *Psychiatry Interpers Biol Process* 2001;:534–7. doi:10.1136/jnnp.70.4.534
- 9 Dreier JP, Major S, Manning A, *et al.* Cortical spreading ischaemia is a novel process involved in ischaemic damage in patients with aneurysmal subarachnoid haemorrhage. *Brain* 2009;**132**:1866–81. doi:10.1093/brain/awp102
- 10 Dorsch NWC, King MT. A review of cerebral vasospasm in aneurysmal subarachnoid haemorrhage Part I: Incidence and effects. *J Clin Neurosci* 1994;**1**:19–26. doi:10.1016/0967-5868(94)90005-1
- 11 Pennings FA, Bouma GJ, Ince C. Direct observation of the human cerebral microcirculation during aneurysm surgery reveals increased arteriolar contractility. *Stroke* 2004;**35**:1284–8. doi:10.1161/01.STR.0000126039.91400.cb

- 12 Gaetani P, Pasqualin A, Rodriguez y Baena R, *et al.* Oxidative stress in the human brain after subarachnoid hemorrhage. *J Neurosurg* 1998;**89**:748–54. doi:10.3171/jns.1998.89.5.0748
- 13 Itoh K, Chiba T, Takahashi S, *et al.* An Nrf2/small Maf heterodimer mediates the induction of phase II detoxifying enzyme genes through antioxidant response elements. *Biochem Biophys Res Commun* 1997;**236**:313–22. doi:10.1006/bbrc.1997.6943
- 14 Venugopal R, Jaiswal a K. Nrf2 and Nrf1 in association with Jun proteins regulate antioxidant response element-mediated expression and coordinated induction of genes encoding detoxifying enzymes. *Oncogene* 1998;**17**:3145–56. doi:10.1038/sj.onc.1202237
- 15 Itoh K, Ishii T, Wakabayashi N, *et al.* Regulatory mechanisms of cellular response to oxidative stress. *Free Radic Res* 1999;**31**:319–24. doi:10.1080/10715769900300881
- 16 Zhao X, Song S, Sun G, *et al.* Neuroprotective Role of Haptoglobin after Intracerebral Hemorrhage. *J Neurosci* 2009;**29**:15819–27. doi:10.1523/JNEUROSCI.3776-09.2009
- 17 Galea J, Cruickshank G, Teeling JL, *et al.* The intrathecal CD163-haptoglobin-hemoglobin scavenging system in subarachnoid hemorrhage. *J Neurochem* 2012;**121**:785–92. doi:10.1111/j.1471-4159.2012.07716.x
- 18 Kristiansen M, Graversen JH, Jacobsen C, *et al.* Identification of the haemoglobin scavenger receptor. *Nature* 2001;**409**:198–201. doi:10.1038/35051594
- 19 Bulters D, Gaastra B, Zolnourian A, *et al.* Haemoglobin scavenging in intracranial bleeding: biology and clinical implications. *Nat Rev Neurol* 2018;**14**:416–32. doi:10.1038/s41582-018-0020-0
- 20 Zhao X, Sun G, Ting SM, *et al.* Cleaning up after ICH: The role of Nrf2 in modulating microglia function and hematoma clearance. *J Neurochem* 2015;**133**:144–52. doi:10.1111/jnc.12974
- 21 Morris CM, Candy JM, Edwardson JA, *et al.* Evidence for the localization of haemopexin immunoreactivity in neurones in the human brain. *Neurosci Lett* 1993;**149**:141–4. doi:10.1016/0304-3940(93)90756-B
- 22 Chen M, Regan RF. Time course of increased heme oxygenase activity and expression after experimental intracerebral hemorrhage: Correlation with oxidative injury. *J Neurochem* 2007;**103**:2015–21. doi:10.1111/j.1471-4159.2007.04885.x
- 23 Harada N, Kanayama M, Maruyama A, *et al.* Nrf2 regulates ferroportin 1-mediated iron efflux and counteracts lipopolysaccharide-induced ferroportin 1 mRNA suppression in macrophages. *Arch Biochem Biophys* 2011;**508**:101–9. doi:10.1016/j.abb.2011.02.001

- 1  
2  
3  
4 24 Sandberg M, Patil J, D'Angelo B, *et al.* NRF2-regulation in brain  
5 health and disease: Implication of cerebral inflammation.  
6 *Neuropharmacology* 2014;**79**:298–306.  
7 doi:10.1016/j.neuropharm.2013.11.004  
8  
9 25 Pan H, Wang H, Zhu L, *et al.* Depletion of Nrf2 enhances  
10 inflammation induced by oxyhemoglobin in cultured mice  
11 astrocytes. *Neurochem Res* 2011;**36**:2434–41. doi:10.1007/s11064-  
12 011-0571-6  
13  
14 26 Chen G, Fang Q, Zhang J, *et al.* Role of the Nrf2-ARE pathway in  
15 early brain injury after experimental subarachnoid hemorrhage. *J*  
16 *Neurosci Res* 2011;**89**:515–23. doi:10.1002/jnr.22577  
17  
18 27 Li T, Wang H, Ding Y, *et al.* Genetic elimination of Nrf2  
19 aggravates secondary complications except for vasospasm after  
20 experimental subarachnoid hemorrhage in mice. *Brain Res*  
21 2014;**1558**:90–9. doi:10.1016/j.brainres.2014.02.036  
22  
23 28 Zhao XD, Zhou YT, Lu XJ. Sulforaphane enhances the activity of  
24 the Nrf2-ARE pathway and attenuates inflammation in OxyHb-  
25 induced rat vascular smooth muscle cells. *Inflamm Res*  
26 2013;**62**:857–63. doi:10.1007/s00011-013-0641-0  
27  
28 29 Zhao X, Wen L, Dong M, *et al.* Sulforaphane activates the cerebral  
29 vascular Nrf2–ARE pathway and suppresses inflammation to  
30 attenuate cerebral vasospasm in rat with subarachnoid hemorrhage.  
31 *Brain Res* 2016;**1653**:1–7. doi:10.1016/j.brainres.2016.09.035  
32  
33 30 Durnford A, Dunbar J, Galea J, *et al.* Haemoglobin scavenging after  
34 subarachnoid haemorrhage. *Acta Neurochir Suppl* 2015;**120**:51–4.  
35 doi:10.1007/978-3-319-04981-6\_9  
36  
37 31 Farrell B, Godwin J, Richards S, *et al.* The United Kingdom  
38 transient ischaemic attack (UK-TIA) aspirin trial: Final results. *J*  
39 *Neurol Neurosurg Psychiatry* Published Online First: 1951.  
40 doi:10.1136/jnnp.54.12.1044  
41  
42 32 Rankin J. Cerebral Vascular Accidents in Patients over the Age of  
43 60: III. Diagnosis and Treatment. *Scott Med J* Published Online  
44 First: 1957. doi:10.1177/003693305700200604  
45  
46 33 Quinn TJ, Dawson J, Walters MR, *et al.* Reliability of the modified  
47 rankin scale: A systematic review. *Stroke* Published Online First:  
48 2009. doi:10.1161/STROKEAHA.109.557256  
49  
50 34 Jennett B, Bond M. ASSESSMENT OF OUTCOME AFTER  
51 SEVERE BRAIN DAMAGE. A Practical Scale. *Lancet* Published  
52 Online First: 1975. doi:10.1016/S0140-6736(75)92830-5  
53  
54 35 Jennett B, Snoek J, Bond MR, *et al.* Disability after severe head  
55 injury: Observations on the use of the Glasgow Outcome Scale. *J*  
56 *Neurol Neurosurg Psychiatry* Published Online First: 1981.  
57 doi:10.1136/jnnp.44.4.285  
58  
59  
60

- 1  
2  
3  
4  
5  
6  
7  
8  
9  
10  
11  
12  
13  
14  
15  
16  
17  
18  
19  
20  
21  
22  
23  
24  
25  
26  
27  
28  
29  
30  
31  
32  
33  
34  
35  
36  
37  
38  
39  
40  
41  
42  
43  
44  
45  
46  
47  
48  
49  
50  
51  
52  
53  
54  
55  
56  
57  
58  
59  
60
- 36 Pace A, Mitchell S, Casselden E, *et al.* A subarachnoid haemorrhage-specific outcome tool. *Brain* 2018;**141**:1111–21. doi:10.1093/brain/awy003
- 37 Powell JH, Beckers K, Greenwood RJ. Measuring progress and outcome in community rehabilitation after brain injury with a new assessment instrument - The BICRO-39 scales. *Arch Phys Med Rehabil* Published Online First: 1998. doi:10.1016/S0003-9993(98)90265-9
- 38 van Heugten C, Rasquin S, Winkens I, *et al.* Checklist for cognitive and emotional consequences following stroke (CLCE-24): development, usability and quality of the self-report version. *Clin Neurol Neurosurg* 2007;**109**:257–62. doi:10.1016/j.clineuro.2006.10.002
- 39 Fisher CM, Kistler JP, Davis JM. Relation of cerebral vasospasm to subarachnoid hemorrhage visualized by computerized tomographic scanning. *Neurosurgery* 1980;**6**:1–9. <http://www.ncbi.nlm.nih.gov/pubmed/7354892>
- 40 Naidech AM, Janjua N, Kreiter KT, *et al.* Predictors and impact of aneurysm rebleeding after subarachnoid hemorrhage. *Arch Neurol* 2005;**62**:410–6. doi:10.1001/archneur.62.3.410
- 41 Zhao J, Kobori N, Aronowski J, *et al.* Sulforaphane reduces infarct volume following focal cerebral ischemia in rodents. *Neurosci Lett* 2006;**393**:108–12. doi:10.1016/j.neulet.2005.09.065
- 42 Zhao X, Sun G, Zhang J, *et al.* Transcription factor Nrf2 protects the brain from damage produced by intracerebral hemorrhage. *Stroke* 2007;**38**:3280–6. doi:10.1161/STROKEAHA.107.486506
- 43 Alfieri A, Srivastava S, Siow RCM, *et al.* Sulforaphane preconditioning of the Nrf2/HO-1 defense pathway protects the cerebral vasculature against blood-brain barrier disruption and neurological deficits in stroke. *Free Radic Biol Med* 2013;**65**:1012–22. doi:10.1016/j.freeradbiomed.2013.08.190
- 44 Sharma V, McNeill JH. To scale or not to scale: The principles of dose extrapolation. *Br. J. Pharmacol.* 2009. doi:10.1111/j.1476-5381.2009.00267.x
- 45 Reagan-Shaw S, Nihal M, Ahmad N. Dose translation from animal to human studies revisited. *FASEB J* Published Online First: 2007. doi:10.1096/fj.07-9574LSF
- 46 Clarke JD, Hsu A, Williams DE, *et al.* Metabolism and tissue distribution of sulforaphane in Nrf2 knockout and wild-type mice. *Pharm Res* 2011;**28**:3171–9. doi:10.1007/s11095-011-0500-z
- 47 Jazwa A, Rojo AI, Innamorato NG, *et al.* Pharmacological Targeting of the Transcription Factor Nrf2 at the Basal Ganglia Provides Disease Modifying Therapy for Experimental

- 1  
2  
3  
4  
5  
6  
7  
8  
9  
10  
11  
12  
13  
14  
15  
16  
17  
18  
19  
20  
21  
22  
23  
24  
25  
26  
27  
28  
29  
30  
31  
32  
33  
34  
35  
36  
37  
38  
39  
40  
41  
42  
43  
44  
45  
46  
47  
48  
49  
50  
51  
52  
53  
54  
55  
56  
57  
58  
59  
60
- Parkinsonism. *Antioxid Redox Signal* 2011;**14**:2347–60.  
doi:10.1089/ars.2010.3731
- 48 Kumar G, Shahripour RB, Harrigan MR. Vasospasm on transcranial  
Doppler is predictive of delayed cerebral ischemia in aneurysmal  
subarachnoid hemorrhage: a systematic review and meta-analysis.  
2016;**124**:1257–64. doi:10.3171/2015.4.JNS15428.
- 49 Tam AKH, Ilodigwe D, Li Z, *et al.* Global cerebral atrophy after  
subarachnoid hemorrhage: a possible marker of acute brain injury  
and assessment of its impact on outcome. *Acta Neurochir Suppl*  
Published Online First: 2013. doi:10.1007/978-3-7091-1192-5\_5
- 50 Campbell N, Verschuur C, Mitchell S, *et al.* Hearing impairment  
after subarachnoid haemorrhage. *Ann Clin Transl Neurol* 2018;**In**  
**press**. doi:10.1002/acn3.714
- 51 Vergouwen MDI, Vermeulen M, van Gijn J, *et al.* Definition of  
delayed cerebral ischemia after aneurysmal subarachnoid  
hemorrhage as an outcome event in clinical trials and observational  
studies: proposal of a multidisciplinary research group. *Stroke*  
2010;**41**:2391–5. doi:10.1161/STROKEAHA.110.589275
- 52 Alaraj A, Hussein AE, Esfahani DR, *et al.* Reducing length of stay  
in aneurysmal subarachnoid hemorrhage: A three year institutional  
experience. *J Clin Neurosci* 2017;**42**:66–70.  
doi:10.1016/j.jocn.2017.03.049
- 53 Teasdale GM, Drake CG, Hunt W, *et al.* A universal subarachnoid  
haemorrhage scale: report of a committee of the world federation of  
Neurosurgical societies. *J. Neurol. Neurosurg. Psychiatry*. 1988.  
doi:10.1136/jnnp.51.11.1457
- 54 Jaja BNR, Saposnik G, Lingsma HF, *et al.* Development and  
validation of outcome prediction models for aneurysmal  
subarachnoid haemorrhage: The SAHIT multinational cohort study.  
*BMJ* Published Online First: 2018. doi:10.1136/bmj.j5745

# BMJ Open

## A study protocol for SFX-01 After Subarachnoid haemorrhage (SAS): A multi-centre randomised double-blinded, placebo controlled trial

|                                 |                                                                                                                                                                                                                                                                                            |
|---------------------------------|--------------------------------------------------------------------------------------------------------------------------------------------------------------------------------------------------------------------------------------------------------------------------------------------|
| Journal:                        | <i>BMJ Open</i>                                                                                                                                                                                                                                                                            |
| Manuscript ID                   | bmjopen-2018-028514.R1                                                                                                                                                                                                                                                                     |
| Article Type:                   | Protocol                                                                                                                                                                                                                                                                                   |
| Date Submitted by the Author:   | 23-May-2019                                                                                                                                                                                                                                                                                |
| Complete List of Authors:       | Zolnourian, Ardalan; University of Southampton, Clinical Neuroscience; University Hospital Southampton NHS Foundation Trust, Galea, Ian; University of Southampton Faculty of Medicine, Experimental Neurology<br>Bulters, Diederik ; University Hospital Southampton NHS Foundation Trust |
| <b>Primary Subject Heading</b>: | Surgery                                                                                                                                                                                                                                                                                    |
| Secondary Subject Heading:      | Medical management, Evidence based practice, Neurology, Surgery, Pharmacology and therapeutics                                                                                                                                                                                             |
| Keywords:                       | Randomised controlled trial, Subarachnoid haemorrhage, Nrf2, Sulforaphane, Delayed cerebral ischaemia                                                                                                                                                                                      |
|                                 |                                                                                                                                                                                                                                                                                            |

SCHOLARONE™  
Manuscripts



I, the Submitting Author has the right to grant and does grant on behalf of all authors of the Work (as defined in the below author licence), an exclusive licence and/or a non-exclusive licence for contributions from authors who are: i) UK Crown employees; ii) where BMJ has agreed a CC-BY licence shall apply, and/or iii) in accordance with the terms applicable for US Federal Government officers or employees acting as part of their official duties; on a worldwide, perpetual, irrevocable, royalty-free basis to BMJ Publishing Group Ltd ("BMJ") its licensees and where the relevant Journal is co-owned by BMJ to the co-owners of the Journal, to publish the Work in this journal and any other BMJ products and to exploit all rights, as set out in our [licence](#).

The Submitting Author accepts and understands that any supply made under these terms is made by BMJ to the Submitting Author unless you are acting as an employee on behalf of your employer or a postgraduate student of an affiliated institution which is paying any applicable article publishing charge ("APC") for Open Access articles. Where the Submitting Author wishes to make the Work available on an Open Access basis (and intends to pay the relevant APC), the terms of reuse of such Open Access shall be governed by a Creative Commons licence – details of these licences and which [Creative Commons](#) licence will apply to this Work are set out in our licence referred to above.

Other than as permitted in any relevant BMJ Author's Self Archiving Policies, I confirm this Work has not been accepted for publication elsewhere, is not being considered for publication elsewhere and does not duplicate material already published. I confirm all authors consent to publication of this Work and authorise the granting of this licence.

1  
2  
3  
4 1 **A study protocol for SFX-01 After Subarachnoid haemorrhage**  
5 2 **(SAS): A multi-centre randomised double-blinded, placebo**  
6 3 **controlled trial**  
7 4  
8  
9 5

10 6 **Date and version:** 16<sup>th</sup> May 2018, Version 7  
11 7

12 8 Ardalan Zolnourian<sup>a,b</sup>, Ian Galea<sup>a,\*</sup>, Diederik Bulters<sup>a,b,\*</sup>  
13 9

14 10 <sup>a</sup> Department of Neurosurgery, University Hospital Southampton, Tremona Road,  
15 11 Southampton, SO16 6YD  
16 12

17 13 <sup>b</sup> Clinical Neurosciences, Clinical and Experimental Sciences, Faculty of Medicine,  
18 14 University of Southampton, Tremona Road, Southampton, SO16 6YD  
19 15

20 16 \* Joint senior authors  
21 17  
22 18  
23 19  
24 20  
25 21  
26 22

27 21 **Ardalan Zolnourian:** Principal investigator, University Hospital Southampton  
28 22

29 23 **Ian Galea:** Co-investigator, University of Southampton  
30 24

31 25 **Diederik Bulters:** Chief investigator, University Hospital Southampton  
32 26

33 27 **Statistician:** David Stone  
34 28

35 29 **Clinical trials coordinating centre:** The Clinical Trials Company Team  
36 30  
37 31  
38 32

39 31 **Steering committee:** Diederik Bulters, Thomas Morris  
40 32

41 33 **Corresponding author:** dbulters@nhs.net  
42 34  
43 35  
44 36  
45 37  
46 38  
47 39  
48 40  
49 41  
50 42  
51 43  
52 44  
53 45  
54 46  
55 47  
56 48  
57 49  
58 50  
59 51  
60 52



1  
2  
3 **Abstract**  
4

5 51

6 **Introduction**  
7

8 53

9 54 Subarachnoid haemorrhage from a ruptured cerebral aneurysm carries high morbidity  
10 55 and mortality. Despite huge advances in techniques to secure the aneurysm, there has  
11 56 been little progress in the treatment of the deleterious effects of the haemorrhage.  
12 57

13 58

14 59 Sulforaphane is an Nrf2 inducer with anti-oxidant and anti-inflammatory properties. It  
15 60 has been shown to improve clinical outcome in experimental models of SAH, but is  
16 61 unstable. SFX-01 (Evgen Pharma) is a novel composition comprised of synthetic  
17 62 sulforaphane stabilised within an  $\alpha$ -cyclodextrin complex. On ingestion, the complex  
18 63 releases sulforaphane making SFX-01 an ideal vehicle for delivery of sulforaphane.

19 64 **Methods and analysis**  
20

21 65

22 66 The objective of the study is to assess the safety, pharmacokinetics and efficacy of  
23 67 SFX-01. This is a prospective, multi-centre, randomised, double-blind placebo-  
24 68 controlled trial in patients aged 18-80 years with aneurysmal subarachnoid  
25 69 haemorrhage in the previous 48 hours. 90 patients will be randomised to receive SFX-  
26 70 01 (300mg) or placebo twice-daily for up to 28 days.  
27 71

28 72

29 73 Safety will be assessed using blood tests and adverse event reporting.  
30 74 Pharmacokinetics will be assessed based on paired blood and CSF sulforaphane levels  
31 75 on day seven. A subgroup will have hourly samples taken during six hours post-  
32 76 dosing on days one and seven. Pharmacodynamics will be assessed by haptoglobin  
33 77 and malondialdehyde levels, and maximum flow velocity of middle cerebral artery  
34 78 will be measured by transcranial Doppler ultrasound.

35 79

36 80 Clinical outcomes will be assessed at days 28, 90 and 180 with mRS, GOSE, SAHOT,  
37 81 SF-36, BICRO-39 and CLCE-24. MRI at six months including quantitative  
38 82 susceptibility mapping and volumetric T1 will measure iron deposition and cortical  
39 83 volume.  
40 84

41 85

42 86 Safety, CSF sulforaphane concentration and middle cerebral artery flow velocity will  
43 87 be primary outcomes and all others secondary.  
44 88

45 89

46 **Ethics and dissemination**  
47

48 90

49 91 Ethical approval was obtained from South Central Hampshire A committee.  
50 92 Outcomes of the trial will be submitted for publication in a peer reviewed journal.  
51 93

52 94

53 95 **Trial registration number:** NCT02614742 ; Pre-results  
54 96  
55 97  
56 98  
57 99  
58 100  
59 101  
60 102

## 96 **Strengths and limitations of this study**

- 97 • **A strength of this study is that it tests a new class of drug not previously used**
- 98 **after human SAH.**
- 99 • **It is at low risk of bias due to placebo control and appropriate blinding.**
- 100 • **The study design includes multiple mechanistic outcomes to give deeper**
- 101 **understanding of any clinical findings.**
- 102 • **The study includes multiple novel outcome measures and MRI sequences.**
- 103 **While these may provide new insights, some are exploratory due to limited**
- 104 **experience with them in SAH to date.**
- 105 • **It is a multicentre trial, and its results should be generalizable to patients**
- 106 **with high volume SAH in neurosurgical units in the UK, although due to the**
- 107 **complexity of its design, it has been limited to three centres to ensure high**
- 108 **quality outcome measurement.**

## 110 **Introduction**

111 Spontaneous Subarachnoid Haemorrhage (SAH) is a devastating cerebrovascular  
112 injury with an incidence of 9.1 per 100,000 population [1]. It affects around 7000  
113 patients in the UK annually. Around 85% are due to ruptured intracranial aneurysms  
114 [2]. The incidence is age related peaking at 52 years. SAH carries a high overall  
115 mortality rate of up to 67% [3], and only half of the survivors are able to live  
116 independently [4]. It therefore has a high burden on society due to the loss of  
117 productivity and resources [5].

118  
119 Conventionally following SAH, treatment is primarily directed to securing the  
120 aneurysm and prevent further re-bleeding. This however does nothing to ameliorate  
121 the morbidity and mortality due to the haemorrhage. The only approved treatment is  
122 nimodipine [6]. However, its effects are small and poor outcome remains a significant  
123 problem [7]. Moreover, even in survivors considered to have made a good recovery,  
124 neurocognitive deficits are common leading to extensive problems with social  
125 reintegration and functioning in the workplace [5].

126  
127 The mechanism of injury following SAH is multifactorial[8]. Early brain injury (EBI)  
128 refers to the processes occurring within the first 72 hours which include blood-brain  
129 barrier (BBB) dysfunction [9], cerebral oedema [10][11], neuronal cell death [12],  
130 altered ionic homeostasis, excitotoxicity, thrombin activation [13], vascular integrity  
131 degradation [14], oxidative stress [15], and inflammation [16]. However, despite the  
132 terminology, mechanisms such as oxidative stress and inflammation are not limited to  
133 this early period. They continue to worsen beyond the first three days, at the same  
134 time as CSF free haemoglobin (Hb) concentration rises markedly as it is released  
135 from the clot and mechanisms to dispose of Hb are saturated. It is also in this delayed  
136 phase when cerebral vasospasm occurs, affecting both micro- [17] and  
137 microvasculature [18].

138  
139 Sulforaphane (SFN) is known to upregulate the nuclear factor erythroid 2-related  
140 factor 2 (Nrf2) pathway. Nrf2 is a redox-sensitive transcription factor that binds to a  
141 specific DNA site, the anti-oxidant response element, upstream of genes encoding  
142 detoxifying and anti-oxidant enzymes [19] [20]. Some of these enzymes include

1  
2  
3 143 glutathione S-transferases (GSTs), NAD(P)H-quinone oxidoreductase 1 (NQO1) and  
4 144 haem oxygenase 1 (HO-1) [19]. During physiological conditions Nrf2 is bound to the  
5 145 Kelch-like ECH associated protein 1 (KEAP1) in the cytoplasm. In response to stress  
6 146 such as SAH, Nrf2 is released from KEAP1 and then translocates to the nucleus  
7 147 leading to enhanced gene transcription [21].  
8 148

9 149 Nrf2 also upregulates haptoglobin (Hp), an acute phase glycoprotein found in plasma  
10 150 [22], as well as cerebrospinal fluid (CSF) [23]. Hp is part of an important Hb  
11 151 scavenging pathway after SAH. It binds tightly to free Hb, and this Hb-Hp complex is  
12 152 taken up by CD163-positive macrophages [24]. This pathway is saturated after SAH  
13 153 [23] and upregulation of Hp represents a possible therapeutic avenue [25]. Nrf2 also  
14 154 regulates degradation of red blood cells, and metabolism of haem and iron through  
15 155 transcriptional upregulation of CD36 [26], haemopexin [27], HO-1 [28] and ferritin  
16 156 [29].  
17 157

18 158 Nrf2 is expressed in the central nervous system (CNS) and is upregulated in response  
19 159 to inflammation and cerebral insults [30]. Nrf2 knockout is associated with a more  
20 160 pronounced inflammatory response *in vitro* [31] and *in vivo* [32], and the increased  
21 161 inflammatory response is associated with more brain oedema, cell death and poorer  
22 162 neurological recovery [33]. SFN increases HO-1, NQO1, and GST- $\alpha$ 1 levels and  
23 163 reduces IL-1 $\beta$ , IL-6, and TNF- $\alpha$  [34]. It leads to a reduction in vasospasm and  
24 164 improves neurological recovery [32] [35].  
25 165

26 166 SFN has a relatively short half-life rendering it impractical for clinical use. SFX-01  
27 167 (Evgen Pharma) is a novel new agent comprising SFN complexed with  $\alpha$ -cyclodextrin  
28 168 which is suitable for clinical use. On ingestion, SFN is released from the  $\alpha$ -  
29 169 cyclodextrin and is an effective method to deliver SFN. In two Phase I trials  
30 170 (NCT01948362, NCT02055716) no serious adverse events were reported in healthy  
31 171 volunteers. Here we describe the protocol for a phase II trial of SFX-01 in patients  
32 172 who have suffered a SAH.  
33 173

## 34 174 **Objectives**

35 175  
36 176 The objective of the study is to assess the safety, pharmacokinetics and efficacy of  
37 177 SFX-01.  
38 178

## 39 179 **Methods**

### 40 180 ***Trial design***

41 181  
42 182  
43 183 This is a prospective, double-blind, parallel group, randomised controlled trial  
44 184 comparing SFX-01 (300 mg) taken orally as capsules or as a suspension via a  
45 185 nasogastric tube (NG) twice-daily for up to 28 days *versus* placebo in patients with  
46 186 SAH within 48 hours of enrolment.  
47 187

48 188 The treatment window of 48 hours was selected as the best compromise between  
49 189 competing factors. SFX-01 has pleiotropic actions against multiple mechanisms each  
50 190 with different temporal profiles. Since SAH is an acute unpredictable event, the  
51 191 earliest one would be able to start treatment is soon after ictus, on admission into

1  
2  
3 192 hospital. This would give optimal protection against early brain injury. Initiating  
4 193 treatment would still be justified up to 72 hours post-ictus, after which delayed  
5 194 cerebral ischaemia (DCI) occurs, such that a delay of more than 72 hours would be  
6 195 expected to undermine treatment efficacy. Within the initial 72 hours, earlier  
7 196 treatment would allow more time for Nrf2 pathway activation and expression of its  
8 197 transcriptome to protect against delayed events, as well as provide more opportunity  
9 198 for SFX-01 to act against early brain injury. On the other hand the earlier one  
10 199 stipulates treatment would start, the more patients one will exclude from the study. No  
11 200 animal studies have been conducted to investigate the timing of sulforaphane  
12 201 administration, and even if available, extrapolation of timing from animal models has  
13 202 its limitations due to the much quicker clot resorption in rodents. After considering all  
14 203 these factors, it was decided to start SFX-01 treatment at the earliest possible  
15 204 opportunity after SAH, yet still allow patients to be included if their presentation was  
16 205 delayed to some extent, to ensure generalizability to real clinical practice where  
17 206 delays in admission to tertiary centres are not uncommon. An audit of the lead study  
18 207 centre showed that most patients are admitted within 48 hours, leading to the adoption  
19 208 of SAH within 48 hours as the inclusion criterion, striking the best compromise  
20 209 between the practicality of recruitment and the need to start treatment early.  
21 210

22 211 Detailed pharmacovigilance will inform the safety of SFX-01. Pharmacokinetics will  
23 212 be determined by measuring levels of SFN and its metabolites in CSF and blood at  
24 213 day seven in all patients; a more detailed profile will be obtained in a subgroup of up  
25 214 to 12 patients who will have hourly blood and CSF samples for six hours after dosing  
26 215 on days one and seven. Pharmacodynamics will be assessed with blood Hp and  
27 216 malondialdehyde (MDA) levels, and middle cerebral artery (MCA) flow velocity as  
28 217 measured on transcranial Doppler (TCD) ultrasound as an estimate of large cerebral  
29 218 artery spasm. Longer term outcome will be assessed using validated outcome scales,  
30 219 at day 28 using Modified Rankin Scale (mRS) ([36] [37] [38] , Glasgow Outcome  
31 220 Score (GOSE) [39][40] and the SAH Outcome Tool (SAHOT) [41] as well as at day  
32 221 90 and 180 using the mRS, GOSE, SAHOT, Brain Injury Community Rehabilitation  
33 222 Outcome Scales (BICRO-39) [42] and the Check List for Cognitive and Emotional  
34 223 consequences following stroke (CLCE-24) [43].  
35 224

### 36 225 *Patient and public involvement*

37 226  
38 227 The overall design of the study including planned investigations i.e. lumbar puncture  
39 228 (LP), magnetic resonance imaging (MRI), blood tests, outcome questionnaires, the  
40 229 treatment methods and the consent procedures were discussed in a local SAH support  
41 230 group consisting of individuals with a previous history of SAH as well as their  
42 231 relatives. The meeting was led by the chief investigator, a consultant neurovascular  
43 232 surgeon, and the neurovascular specialist nurse who are normally the main point of  
44 233 contact for SAH patients. The results were used to inform planning of the trial.  
45 234 Particular attention was given to the study lumbar puncture which was felt to be  
46 235 justified on the grounds that the majority of patients will undergo CSF diversion for  
47 236 clinical reasons anyway, and evidence from a randomised controlled trial that CSF  
48 237 diversion in all Fisher 3&4 patients causes no harm and appears to provide short term  
49 238 symptomatic benefit [44]. The meeting was also beneficial in shaping and improving  
50 239 the patient information sheet and consent forms.  
51 240

### 52 241 *Study setting*

242

This is a multicentre study conducted in regional neurosciences centres with specialist services to treat aneurysmal SAH. Patients will be identified at referral to the admitting neurosurgical or neurointensive care units. After informed consent, dosing and study interventions will occur in the neurosciences centre until patients are discharged to either home or their local hospitals. There are three recruiting centres; University Hospital Southampton, Royal Infirmary of Edinburgh and the Royal London Hospital. Upon discharge, follow-up may take place in clinic, or at visits to district general hospitals and rehabilitation centres, or patients' residences.

251

## **Eligibility Criteria**

252

253

254

### ***Inclusion criteria***

255

256

257

258

259

260

261

262

263

264

265

266

267

268

269

270

271

272

273

274

275

276

277

278

279

280

281

282

283

284

285

286

287

288

289

290

1. Patients with radiological evidence of spontaneous aneurysmal SAH
2. Fisher grade 3 or 4 on CT
3. Definitive treatment of aneurysm has not been ruled out
4. Previously living independently
5. In the opinion of the investigator, the delay from ictus to randomisation and initiation of trial medication will not exceed 48 hours
6. Aged 18 to 80 years
7. In the opinion of the investigator it will be possible to obtain Informed Consent from the Patient, Personal Legal Representative or Professional Legal representative within 24 hours of first dose

267

### ***Exclusion criteria***

268

269

270

271

272

273

274

275

276

277

278

279

280

281

282

283

284

285

286

Recruitment will be limited to Fisher grade 3 and 4 SAH. These patients represent the majority of aneurysmal SAH. They have a higher volume of haemorrhage with a poorer outcome and more delayed neurological deficits [45]. They are therefore mechanistically and clinically expected to derive greatest benefit from SFX-01.

291  
292 Inclusion of patients with unsecured aneurysms would risk a high incidence of  
293 rebleeding in the study. Rebleeding is associated with exceedingly bad outcomes [46],  
294 masking any effect from SFX-01. However, since not all aneurysms are secured  
295 within 48 hours, there will be no requirement for the aneurysm to have been secured  
296 prior to enrolment. Instead patients in whom treatment of the aneurysm has been ruled  
297 out due to poor clinical status will be excluded.

298  
299 Although there are no known risks to kidney or liver, due to the relative inexperience  
300 with SFX-01 in humans, patients with liver or kidney problems will be excluded.

## 301 302 **Intervention**

### 303 304 ***Trial medication***

305  
306 SFX-01 (active 300 mg capsule) or placebo ( $\alpha$ -cyclodextrin only capsule) will be  
307 taken orally or as a suspension via a nasogastric tube (NG) twice daily for up to 28  
308 days. Pharmagra manufacture the active pharmaceutical ingredient (API) in North  
309 Carolina, US. The API is then encapsulated at Quotient in Reading, UK. The API  
310 manufacture has been audited by the FDA and Evgen pharma. SFX-01 and placebo  
311 capsules as well as their contents will be identical in appearance. They will be stored  
312 at 2-8 degrees Celsius.

313  
314 Animal studies in ischaemic stroke, intracerebral haemorrhage and SAH have all used  
315 5 mg/kg dose of SFN in rodents [32] [47] [48] [49]. Conversion of animal doses to  
316 humans using body surface area, as has been widely recommended [50] [51], yields a  
317 human dose of 50 mg SFN. This is equivalent to 300 mg of SFX-01 containing 46.15  
318 mg of SFN. In the clinical studies conducted to date, SFX-01 has been shown to be  
319 well tolerated at doses of 600mg once daily and 300mg twice daily with no serious  
320 adverse effects. Therefore, no further dose ranging studies were performed.

### 321 322 ***De-escalation from the trial regimen***

323  
324 In the event of tolerability problems whilst the patient is in the neurosurgical centre,  
325 the Investigator will assess whether simple measures to ease the effects of the adverse  
326 event(s) may be implemented (i.e. antacid in the case of GI irritation or anti-emetic in  
327 the event of nausea).

328 The investigator will also assess whether or not the adverse event(s) could be related  
329 to the trial medication and severe enough to warrant a dose frequency reduction. In  
330 the first instance the investigator may consider missing one dose. If a dose frequency  
331 reduction is warranted, from that point onwards the second dose of the day will be  
332 omitted; a dose frequency increase back to twice daily will not be permitted.

333  
334 If tolerability problems continue then the investigational medication will be stopped;  
335 patients will continue in the study and complete the study visits. The staged dose  
336 frequency de-escalation (dropping to once daily) will not be carried out after  
337 discharge from the neurosurgical centre; if tolerability problems occur after discharge,  
338 medication will be stopped; patients will continue in the study and complete the study  
339 visits in accordance with the schedule of assessments.

340

1  
2  
3 341 ***Treatment compliance***

4 342  
5 343 Compliance with treatment will be recorded during the inpatient hospital stay by  
6 344 health care professionals and/or a member of the research team. On discharge to the  
7 345 usual residence, responsibility for this will be transferred to the patient or their  
8 346 Personal Legal Representative, aided by detailed instructions. In the event of  
9 347 discharge to a rehabilitation unit or patient local hospital, written instructions will be  
10 348 provided on discharge and verbal communication with the clinical team will ensure  
11 349 compliance.

12 350  
13 351 All patients will be discharged with a patient diary which will be filled in and  
14 352 collected at day 28. Compliance will be further monitored by drug reconciliation.  
15 353 Patients will be asked to return the medication bottle and any residual contents at the  
16 354 day 28 visit. At this time any residual tablets will be counted and recorded.

17 355  
18 356 ***Concomitant treatment***

19 357  
20 358 There are no known drug interactions, and participation in the trial will not alter  
21 359 routine treatment of SAH. Participation in other interventional research studies will  
22 360 not be allowed until after the last follow up visit.

23 361  
24 362 **Outcomes**

25 363  
26 364 **Primary end-points**

27 365  
28 366 ***Safety***

29 367  
30 368 To evaluate the safety of up to 28 days of SFX-01 dosed at up to an equivalent of  
31 369 92mg SFN per day.

32 370  
33 371 Prior to the start of this study, the trial medication had only been used in healthy  
34 372 individuals and not in a patient population. Therefore safety will be one of the main  
35 373 objectives of this study. This will be evaluated through routine tests (full blood count,  
36 374 urea and electrolytes, coagulation screen, liver function tests, and urine microscopy)  
37 375 at baseline, post-dose, day seven and day 28 as well as close monitoring of patients  
38 376 for any side-effects or adverse events. Adverse events will be coded following  
39 377 MEDDRA and followed up until resolution and graded for severity. Incidence of dose  
40 378 de-escalation or discontinuation will also be reported.

41 379  
42 380 ***Pharmacokinetic***

43 381  
44 382 To detect the presence of SFN and its metabolites in CSF and blood.

45 383  
46 384 Animal models have shown that SFN crosses the blood-brain barrier and can therefore  
47 385 be detected in the brain [52] [53] There is some variation in the levels achieved in  
48 386 these studies, and it has not been studied in humans. All patients will have a paired  
49 387 CSF/blood sample taken at seven days post-ictus. This will be via a LP unless the  
50 388 patient has an external ventricular drain (EVD) for their clinical care in which case it  
51 389 will be obtained from the EVD. In addition, up to 12 patients with an EVD will be  
52 390 asked to consent to hourly CSF and blood samples for six hours after dosing on days

391 one and seven. Hourly CSF sampling will be performed by trained study personnel  
392 using a bespoke sterile closed cascade of syringes so that the EVD line is accessed  
393 directly only once to reduce the risk of infection. Sample collection and processing  
394 are detailed in specific study operating procedures.

395

### 396 *Vasospasm*

397

398 To determine if a minimum of seven days treatment with SFX-01 reduces MCA peak  
399 flow velocity following SAH.

400

401 TCD ultrasound will be used to measure the MCA, ICA and ECA maximum flow  
402 velocity and the Lindegaard ratio will be calculated. TCDs will be performed on  
403 alternate daily basis including at baseline. They will be performed for at least seven  
404 days or until no longer clinically indicated. Blood flow velocity is measured in  
405 cm/second and is inversely related to the luminal diameter of the vessel. The greater  
406 this value the more likely the degree of narrowing or spasm in the vessel. It has a  
407 good predictive value for DCI. A recent systematic review and meta-analysis, which  
408 pooled data from 2870 patients, showed a sensitivity of 90%, specificity of 71%, and  
409 negative and positive predictive values of 92% and 57% respectively [54].

410

### 411 Secondary end-points

412

#### 413 *Pharmacodynamic*

414

#### 415 *CSF and blood – Haptoglobin and Malondialdehyde*

416

417 Hp represents a major Hb detoxification pathway and is upregulated by Nrf2. MDA is  
418 a measure of oxidative stress. Hp and MDA will be measured in blood at baseline,  
419 day seven and day 28, and in CSF on day seven. A local audit at the main study  
420 neurosurgical centre showed that approximately 1/3 of patients have an EVD sited as  
421 part of their routine clinical care to treat hydrocephalus. In these patients additional  
422 samples will be obtained. This will allow investigation of the temporal profile of Hp  
423 level and oxidative stress. Additionally, there will be exploratory investigations using  
424 proteomics, transcriptomics and genomics using CSF and blood samples.

425

#### 426 *MRI – iron and brain volume*

427

428 All patients will have MRI 180 days after SAH. Brain volume on T1 sequences will  
429 be measured, since this has been shown to correlate with outcome [55]. Cortical iron  
430 content will be assessed using quantitative susceptibility mapping after susceptibility  
431 weighted MR imaging, which predominantly measures siderotic iron deposits [56].  
432 Iron is a major component of Hb, and it is unknown what effects SFX-01, SFN or  
433 increased Hp binding of Hb may have on the downstream iron pathway.

434

#### 435 *Clinical outcome*

436

437

438

439

440

- mRS at seven days, discharge, 28, 90 and 180 days.
- Incidence of DCI defined as a new focal deficit or reduction in GCS (by two points or more) if not explained by other causes (i.e. re-bleed, hydrocephalus, seizure, meningitis, sepsis or hyponatraemia) [57]



- 1  
2  
3 441 • Incidence of new cerebral infarct on CT or MRI  
4 442 • Institution of hypertensive therapy for presumed DCI  
5 443 • SF-36 quality of life survey at 28, 90 & 180 days  
6 444 • CLCE-24 and BICRO-39 at 90 & 180 days  
7 445 • SAHOT and GOSE at 28, 90 & 180 days  
8 446 • Length of acute hospital stay  
9 447 • Discharge destination  
10  
11  
12

13 449 A number of measures of efficacy have been selected reflecting the most common  
14 450 stroke outcome assessment (mRS), the most common brain injury assessment  
15 451 (GOSE), the most common quality of life survey (SF-36) and the only SAH specific  
16 452 outcome tool [41] to determine the most sensitive tool and make estimates of effect  
17 453 size. SAHOT includes 56 items dealing with cognitive, physical, and  
18 454 behavioural/psychological consequences of SAH, developed in a SAH focus group by  
19 455 patients and experts in the field. This outcome tool has been validated and proposed  
20 456 as a more sensitive and responsive tool in SAH [41]. All these tools will be  
21 457 administered by research nurses or doctors trained in mRS and GOSE in person, or in  
22 458 the event this is not feasible, by phone.  
23  
24 459

25 460 A number of short term patient outcomes related to the incidence of DCI are included  
26 461 *a priori* such as incidence of infarction as adjudicated by a blinded consultant  
27 462 neuroradiologist (with baseline CT and follow up MRI), and institution of  
28 463 hypertensive therapy. Several simple outcomes including length of stay and discharge  
29 464 destination that have been associated with outcome [58] are also included *a priori* in  
30 465 the event any patients are lost to longer term follow up.  
31  
32 466

### 33 467 Schedule of assessments

34 468

| Time points <sup>1</sup>                      | D 0-2 | D 1-3<br>(12-24<br>post-<br>dose) | Ongoing<br>assessment<br>(Alternate days) <sup>6</sup><br>(+/-1) | D 7<br>(+/-1) | Discharge<br>(-2) | D 28<br>(-6/+2) | D 90<br>(+/-14) | D 180<br>(+/- 28) |
|-----------------------------------------------|-------|-----------------------------------|------------------------------------------------------------------|---------------|-------------------|-----------------|-----------------|-------------------|
| <b>Study procedures</b>                       |       |                                   |                                                                  |               |                   |                 |                 |                   |
| Consent                                       | X     |                                   |                                                                  |               |                   |                 |                 |                   |
| Inclusion/exclusion                           | X     |                                   |                                                                  |               |                   |                 |                 |                   |
| WFNS grading                                  | X     |                                   |                                                                  |               |                   |                 |                 |                   |
| IMP treatment                                 | X     |                                   |                                                                  |               |                   |                 |                 |                   |
| Safety bloods <sup>2</sup>                    | X     | X                                 | X                                                                | X             | X                 | X               |                 |                   |
| Safety urine                                  | X     |                                   |                                                                  | X             | X                 | X               |                 |                   |
| Lipid profile<br>Coagulation screen           | X     |                                   |                                                                  | X             | X                 | X               |                 |                   |
| TCD readings <sup>3</sup>                     |       | X                                 | X                                                                | X             |                   |                 |                 |                   |
| HP, MDA (Blood/CSF) <sup>4</sup>              | X     |                                   |                                                                  | X             |                   | X               |                 |                   |
| SFN & metabolites<br>(Blood/CSF) <sup>5</sup> |       |                                   |                                                                  | X             |                   |                 |                 |                   |
| Pregnancy test                                | X     |                                   |                                                                  |               |                   |                 |                 |                   |
| mRS                                           |       |                                   |                                                                  | X             | X                 | X               | X               | X                 |
| GOSE                                          |       |                                   |                                                                  |               |                   | X               | X               | X                 |
| SAHOT                                         |       |                                   |                                                                  |               |                   | X               | X               | X                 |
| SF-36                                         |       |                                   |                                                                  |               |                   | X               | X               | X                 |

|          |  |  |  |  |  |  |   |   |
|----------|--|--|--|--|--|--|---|---|
| BICRO-39 |  |  |  |  |  |  | X | X |
| CLCE-24  |  |  |  |  |  |  | X | X |
| MRI      |  |  |  |  |  |  |   | X |

- 1- Ictus is defined as the onset of symptoms/haemorrhage and is referred to as day 0.
- 2- Safety bloods include: Biochemistry: Sodium, Potassium, Urea, Creatinine, Glucose, Calcium, Total Bilirubin, Alkaline Phosphatase, Alanine Transaminase, Albumin, C-Reactive Protein, and Haematology including Haemoglobin, White Blood Cell Count, Neutrophils (Absolute), Lymphocytes (Absolute), Platelets. These will be done at least on alternate days until no longer clinically indicated.
- 3- TCDs will be performed at baseline before day 3 and will be repeated on alternate daily basis until at least day 7 or where clinically indicated.
- 4- Hp and MDA will be assayed in both CSF and blood at baseline, where possible i.e if patient has an EVD fitted this will be measured in the CSF and blood at baseline as well as every other day until EVD is removed. All patients will have pP and MDA assayed on either a LP or EVD sample on day 7.
- 5- SFN and its metabolites will be measured on day 7 in all patient with paired blood and CSF (LP or EVD sample).
- 6- These assessments will be done on every other day basis with a +/- 1 day window. They will be carried on until discharge or up to when it is clinically required.

### **Sample Size**

No formal sample size calculation has been carried out; the power associated with a sample size of 90 is based on the following assumptions:

- The error probability for the Type I error should not exceed 5% for a one-sided test;
- The primary endpoint will be compared between treatment groups by means of a t-test
- The mean maximum MCA flow velocity for patients treated with SFX-01 is estimated as 175 cm/s and
- The standard deviation of maximum MCA flow velocity is 50 cm/s

Under these assumptions 90 patients will give 80% power to detect a difference in maximum MCA velocity which is approximately half of the standard deviation of the mean value. The standard deviation was assumed to be approximately 30% of the mean value.

### **Recruitment**

Patients with SAH who present to the clinical centres and meet the above criteria will be considered for recruitment. The inclusion and exclusion criteria reflect national practice. Patients will be identified by the treating clinical team at the time of referral, admission or daily medical handover.

### **Assignment of intervention**

#### ***Randomisation and blinding***

Patients will be randomised in a 1:1 ratio to the active or placebo arm. Randomisation will be stratified using the most recent World Federation of Neurosurgical Societies (WFNS) grade [59] prior to randomization. Patients in different WFNS groups will have significantly different outcomes [60] and imbalance between treatment arms risks treatment allocation bias.

1  
2  
3 518  
4 519 All treatment packs will be otherwise identical in appearance. Placebo capsules will  
5 520 be identical and contain  $\alpha$ -cyclodextrin making the contents indistinguishable should  
6 521 they be opened either inadvertently or for the purposes of NG administration. Patients  
7 522 will be randomised to one of the treatment groups by allocation of the appropriate,  
8 523 sequentially numbered treatment pack from either the clinical trials pharmacy, or a  
9 524 suitably calibrated and monitored fridge outside the pharmacy. The treatment packs  
10 525 will be pre-numbered according to a block balanced randomisation code with a ratio  
11 526 of 1:1 by a blinded third party. They will be selected as per WFNS grading by a  
12 527 member of a research team from pharmacy.  
13  
14  
15 528

### 16 529 ***Unblinding***

17 530  
18 531 The Pharmacy will receive a sealed envelope containing the identity of each trial  
19 532 medication bottle. An envelope may be opened only in the case of a serious adverse  
20 533 event and only when it is essential to the subsequent management of the patient. The  
21 534 decision to unblind will be made in discussion between the treating clinician and PI  
22 535 and where possible CI. The independent trial centre will be responsible for breaking  
23 536 codes for regulatory submissions of Suspected Unexpected Serious Adverse  
24 537 Reactions (SUSARs), thereby maintaining the overall confidentiality of the code  
25 538 breaks. If the code is broken the data for that patient will be excluded from the Per  
26 539 Protocol Population analysis but included in the Intention to Treat Analysis. They will  
27 540 continue in the study and complete the study visits in accordance with the study visit  
28 541 schedule.  
29  
30  
31 542

### 32 543 **Data collection and management**

33 544  
34 545 Data collection will be performed by Good Clinical Practice-trained members of the  
35 546 research team. Study specific training and additional training in disease specific  
36 547 questionnaires will be provided. The data will be entered into a secure electronic case  
37 548 report form.  
38  
39 549

### 40 550 ***Statistical analysis***

41 551  
42 552 The following populations will be considered for the analysis:

- 43 553 • Intention-to-Treat population (ITT): all randomised patients who receive at  
44 554 least one dose of study medication and with any post-dose efficacy  
45 555 evaluations. Patients where the time from ictus to admission is unknown are  
46 556 to be considered as part of the ITT population .
- 47 557 • Per-protocol population (PPP): The Per Protocol Population (for Primary  
48 558 analysis) will be considered to be those patients in the ITT population that  
49 559 have been dosed for a minimum to day seven post ictus without any major  
50 560 protocol violations (i.e. wrong inclusions, etc.).
- 51 561 • Safety population: all randomised patients who have taken at least one dose of  
52 562 study medication.  
53  
54  
55 563

56 564 Last observation carried forwards (LOCF) will be used to impute missing outcome at  
57 565 6 months. The final full statistical analysis plan will be published prior to unblinding.  
58  
59 566  
60

## 567 ***Monitoring***

568  
569 A data safety monitoring board (DSMB) has been set-up to monitor the safety aspect  
570 of the trial throughout. The DSMB will be independent of the study team and  
571 company and has its own charter. A steering committee (consisting of the Chief  
572 Investigator and the sponsor's Chief Medical Officer) will receive and review the  
573 reports from DSMB, and take action as appropriate.

574  
575 The first 20 patients will only be dosed as an inpatient and may therefore have courses  
576 shorter than 28 days. The DSMB plan to hold an initial meeting after recruitment of  
577 20 patients who will have completed seven days of trial medication. If there are no  
578 safety concerns, further patients will be allowed to be dosed with the trial drug after  
579 discharge to other hospitals or home. The DSMB will also meet if there are any  
580 SUSARs or if two patients have had an increase in the grading of the severity of  
581 adverse events.

582  
583 Recruitment will stop once the target has been reached or if DSMB deems the study  
584 or trial drug to be associated with a significant number of adverse events compared to  
585 the normal patient population. The recruitment target is set to a minimum of 90  
586 patients between three centres in the United Kingdom. Up to 120 patients may be  
587 recruited in order to allow for withdrawals and deaths.

588  
589 External monitoring will occur regularly throughout the study and after the study has  
590 been completed. At these visits the monitor(s) will inspect various study records; case  
591 report forms, investigator site file and source data, provided that subject  
592 confidentiality is respected.

## 593 594 ***Adverse events reporting***

595  
596 All adverse events, adverse drug reactions and serious adverse events (SAE) will be  
597 accurately documented. SAEs will be reported within 24 hours of awareness.  
598 Pregnancies occurring during the study must be reported immediately and monitored  
599 closely.

## 600 601 ***Data Availability***

602  
603 Upon completion of the study, data will be shared with other eligible investigators  
604 through academically established means. The datasets used and/or analysed during the  
605 study will be available from the corresponding author on reasonable request.

## 606 607 **Ethical considerations and Informed Consent**

### 608 609 ***Consent procedures and emergency dosing***

610  
611 Most patients with acute SAH present with either severe headache or altered level of  
612 consciousness. Many will lack capacity with no legal representative immediately  
613 available. SAH is an acute emergency and any benefit from SFX-01 is likely to be  
614 greatest the earlier it is administered. The study has therefore been granted ethical  
615 permission to obtain baseline blood testing and administer two doses of trial drug  
616 without consent if the patient is lacking in capacity and no legal representative is

617 available. If no consent can be obtained at that point, the patient will be withdrawn  
618 from the study.

619

620

621 Consent will be obtained in one of three scenarios:

622

623 1- Patients with capacity

624 2- Patients without capacity, but with a relative or next of kin available  
625 immediately in person

626 3- Patients without capacity and no relative or next of kin immediately available  
627 in person. In this case, a professional legal representative will be approached.

628

### 629 ***Re-Consent***

630

631 This must take place in two different scenarios:

632 1- When patients regain capacity they must be re-consented.

633 2- When patients have been consented through a professional legal  
634 representative, after which time either they regain capacity or the next of kin  
635 becomes available.

636

### 637 **Discussion**

638

639 There is mounting evidence supporting the role of the Nrf2 pathway in outcome after  
640 SAH. SFN upregulates Nrf2 expression and improves outcome in animal models.  
641 SFX-01 represents an exciting and novel way to deliver SFN to SAH patients with the  
642 potential to improve their lives.

643

644 This trial will investigate the safety, pharmacokinetics and pharmacodynamics of  
645 SFX-01 after SAH. If successful it may deliver long-term benefit to patients who have  
646 suffered SAH and provide new hope to a group of patients characterised by complex  
647 neurocognitive problems and disability.

648

### 649 **Footnotes**

650 **Authors' contributions:** DB conceived the trial. AZ, IG and DB were all involved in  
651 the design of the study and its setup. AZ and DB wrote the study protocol. DB  
652 managed the recruitment of other centres. IG and DB reviewed the protocol  
653 manuscript and approved the final version.

654

655 **Acknowledgements:** The protocol was revised and finalised in conjunction with  
656 David Howatt and Robert Holland previously at Evgen Pharma. The manuscript was  
657 reviewed by Sally Ross and Thomas Morris of Evgen Pharma.

658

659 **Funding:** This study is funded and sponsored by EvgenPharma.

660

661 **Competing interests:** None declared. The authors have no financial or non financial  
662 interests in Evgen Pharma.

663

664 **Ethical approval:** South Central Research Ethics Committee, Hampshire A, UK.

665 **Word count:** 4720

## References

- 666  
667  
668 1 de Rooij NK, Linn FHH, van der Plas JA, *et al.* Incidence of  
669 subarachnoid haemorrhage: a systematic review with emphasis on  
670 region, age, gender and time trends. *J Neurol Neurosurg Psychiatry*  
671 2007;**78**:1365–72. doi:10.1136/jnnp.2007.117655
- 672 2 Van Gijn J, Rinkel GJE. Subarachnoid haemorrhage: Diagnosis,  
673 causes and management. *Brain*. 2001. doi:10.1093/brain/124.2.249
- 674 3 Nieuwkamp DJ, Setz LE, Algra A, *et al.* Changes in case fatality of  
675 aneurysmal subarachnoid haemorrhage over time, according to age,  
676 sex, and region: a meta-analysis. *Lancet Neurol* 2009;**8**:635–42.  
677 doi:10.1016/S1474-4422(09)70126-7
- 678 4 Kirkpatrick P, Lindsay K, Shaw M, *et al.* *National Study of*  
679 *Subarachnoid Haemorrhage*. 2006.
- 680 5 Rivero-Arias O, Gray A, Wolstenholme J. Burden of disease and  
681 costs of aneurysmal subarachnoid haemorrhage (aSAH) in the  
682 United Kingdom. *Cost Eff Resour Alloc* 2010;**8**:1–12.  
683 doi:10.1186/1478-7547-8-6
- 684 6 Pickard JD, Murray GD, Illingworth R, *et al.* Effect of oral  
685 nimodipine on cerebral infarction and outcome after subarachnoid  
686 haemorrhage : British aneurysm nimodipine trial. *Bmj*  
687 1989;**298**:636–42. doi:10.1136/bmj.298.6674.636
- 688 7 Dorhout Mees SM, Rinkel GJ, Feigin VL, *et al.* Calcium  
689 antagonists for aneurysmal subarachnoid haemorrhage. *Cochrane*  
690 *Database Syst Rev* Published Online First: 2007.  
691 doi:10.1002/14651858.CD000277.pub3
- 692 8 Zolnourian A, Galea I, Bulters D. Neuroprotective Role of the Nrf2  
693 Pathway in Subarachnoid Haemorrhage and Its Therapeutic  
694 Potential. *Oxid Med Cell Longev* 2019;**2019**:1–21.  
695 doi:10.1155/2019/6218239
- 696 9 Dóczi T. The pathogenetic and prognostic significance of blood-  
697 brain barrier damage at the acute stage of aneurysmal subarachnoid  
698 haemorrhage. Clinical and experimental studies. *Acta Neurochir*  
699 *(Wien)* 1985;**77**:110–  
700 32.<http://www.ncbi.nlm.nih.gov/pubmed/4072781>
- 701 10 László FA, Varga C, Dóczi T. Cerebral oedema after subarachnoid  
702 haemorrhage. Pathogenetic significance of vasopressin. *Acta*  
703 *Neurochir (Wien)* 1995;**133**:122–  
704 33.<http://www.ncbi.nlm.nih.gov/pubmed/8748754>
- 705 11 Zetterling M, Hallberg L, Ronne-Engström E. Early global brain  
706 oedema in relation to clinical admission parameters and outcome in  
707 patients with aneurysmal subarachnoid haemorrhage. *Acta*  
708 *Neurochir (Wien)* 2010;**152**:1527–33. doi:10.1007/s00701-010-

- 1  
2  
3 709 0684-8  
4  
5 710 12 Cahill WJ, Calvert JH, Zhang JH. Mechanisms of early brain injury  
6 711 after subarachnoid hemorrhage. *J Cereb Blood Flow Metab*  
7 712 2006;**26**:1341–53. doi:10.1038/sj.jcbfm.9600283  
8  
9 713 13 Lad SP, Hegen H, Gupta G, *et al.* Proteomic biomarker discovery in  
10 714 cerebrospinal fluid for cerebral vasospasm following subarachnoid  
11 715 hemorrhage. *J Stroke Cerebrovasc Dis* 2012;**21**:30–41.  
12 716 doi:10.1016/j.jstrokecerebrovasdis.2010.04.004  
13  
14 717 14 Kusaka G, Ishikawa M, Nanda A, *et al.* Signaling pathways for  
15 718 early brain injury after subarachnoid hemorrhage. *J Cereb Blood*  
16 719 *Flow Metab* Published Online First: 2004.  
17 720 doi:10.1097/01.WCB.0000125886.48838.7E  
18  
19 721 15 Gaetani P, Pasqualin A, Rodriguez y Baena R, *et al.* Oxidative  
20 722 stress in the human brain after subarachnoid hemorrhage. *J*  
21 723 *Neurosurg* Published Online First: 2009.  
22 724 doi:10.3171/jns.1998.89.5.0748  
23  
24 725 16 Fassbender K, Hodapp B, Rossol S, *et al.* Inflammatory cytokines  
25 726 in subarachnoid haemorrhage: Association with abnormal blood  
26 727 flow velocities in basal cerebral arteries. *J Neurol Neurosurg*  
27 728 *Psychiatry* Published Online First: 2001. doi:10.1136/jnnp.70.4.534  
28  
29 729 17 Pennings FA, Bouma GJ, Ince C. Direct observation of the human  
30 730 cerebral microcirculation during aneurysm surgery reveals  
31 731 increased arteriolar contractility. *Stroke* 2004;**35**:1284–8.  
32 732 doi:10.1161/01.STR.0000126039.91400.cb  
33  
34 733 18 Dorsch NWC, King MT. A review of cerebral vasospasm in  
35 734 aneurysmal subarachnoid haemorrhage Part I: Incidence and effects.  
36 735 *J. Clin. Neurosci.* 1994. doi:10.1016/0967-5868(94)90005-1  
37  
38 736 19 Itoh K, Chiba T, Takahashi S, *et al.* An Nrf2/small Maf heterodimer  
39 737 mediates the induction of phase II detoxifying enzyme genes  
40 738 through antioxidant response elements. *Biochem Biophys Res*  
41 739 *Commun* 1997;**236**:313–22. doi:10.1006/bbrc.1997.6943  
42  
43 740 20 Venugopal R, Jaiswal a K. Nrf2 and Nrf1 in association with Jun  
44 741 proteins regulate antioxidant response element-mediated expression  
45 742 and coordinated induction of genes encoding detoxifying enzymes.  
46 743 *Oncogene* 1998;**17**:3145–56. doi:10.1038/sj.onc.1202237  
47  
48 744 21 Itoh K, Ishii T, Wakabayashi N, *et al.* Regulatory mechanisms of  
49 745 cellular response to oxidative stress. *Free Radic Res* 1999;**31**:319–  
50 746 24. doi:10.1080/10715769900300881  
51  
52 747 22 Zhao X, Song S, Sun G, *et al.* Neuroprotective Role of Haptoglobin  
53 748 after Intracerebral Hemorrhage. *J Neurosci* 2009;**29**:15819–27.  
54 749 doi:10.1523/JNEUROSCI.3776-09.2009  
55  
56 750 23 Galea J, Cruickshank G, Teeling JL, *et al.* The intrathecal CD163-  
57 751 haptoglobin-hemoglobin scavenging system in subarachnoid

- 1  
2  
3 752 hemorrhage. *J Neurochem* 2012;**121**:785–92. doi:10.1111/j.1471-  
4 753 4159.2012.07716.x
- 5  
6 754 24 Kristiansen M, Graversen JH, Jacobsen C, *et al.* Identification of  
7 755 the haemoglobin scavenger receptor. *Nature* 2001;**409**:198–201.  
8 756 doi:10.1038/35051594
- 9  
10 757 25 Bulters D, Gaastra B, Zolnourian A, *et al.* Haemoglobin scavenging  
11 758 in intracranial bleeding: biology and clinical implications. *Nat Rev*  
12 759 *Neurol* 2018;**14**:416–32. doi:10.1038/s41582-018-0020-0
- 13  
14 760 26 Zhao X, Sun G, Ting SM, *et al.* Cleaning up after ICH: The role of  
15 761 Nrf2 in modulating microglia function and hematoma clearance. *J*  
16 762 *Neurochem* 2015;**133**:144–52. doi:10.1111/jnc.12974
- 17  
18 763 27 Morris CM, Candy JM, Edwardson JA, *et al.* Evidence for the  
19 764 localization of haemopexin immunoreactivity in neurones in the  
20 765 human brain. *Neurosci Lett* 1993;**149**:141–4. doi:10.1016/0304-  
21 766 3940(93)90756-B
- 22  
23 767 28 Chen M, Regan RF. Time course of increased heme oxygenase  
24 768 activity and expression after experimental intracerebral hemorrhage:  
25 769 Correlation with oxidative injury. *J Neurochem* 2007;**103**:2015–21.  
26 770 doi:10.1111/j.1471-4159.2007.04885.x
- 27  
28 771 29 Harada N, Kanayama M, Maruyama A, *et al.* Nrf2 regulates  
29 772 ferroportin 1-mediated iron efflux and counteracts  
30 773 lipopolysaccharide-induced ferroportin 1 mRNA suppression in  
31 774 macrophages. *Arch Biochem Biophys* 2011;**508**:101–9.  
32 775 doi:10.1016/j.abb.2011.02.001
- 33  
34 776 30 Sandberg M, Patil J, D'Angelo B, *et al.* NRF2-regulation in brain  
35 777 health and disease: Implication of cerebral inflammation.  
36 778 *Neuropharmacology* 2014;**79**:298–306.  
37 779 doi:10.1016/j.neuropharm.2013.11.004
- 38  
39 780 31 Pan H, Wang H, Zhu L, *et al.* Depletion of Nrf2 enhances  
40 781 inflammation induced by oxyhemoglobin in cultured mice  
41 782 astrocytes. *Neurochem Res* 2011;**36**:2434–41. doi:10.1007/s11064-  
42 783 011-0571-6
- 43  
44 784 32 Chen G, Fang Q, Zhang J, *et al.* Role of the Nrf2-ARE pathway in  
45 785 early brain injury after experimental subarachnoid hemorrhage. *J*  
46 786 *Neurosci Res* 2011;**89**:515–23. doi:10.1002/jnr.22577
- 47  
48 787 33 Li T, Wang H, Ding Y, *et al.* Genetic elimination of Nrf2  
49 788 aggravates secondary complications except for vasospasm after  
50 789 experimental subarachnoid hemorrhage in mice. *Brain Res*  
51 790 2014;**1558**:90–9. doi:10.1016/j.brainres.2014.02.036
- 52  
53 791 34 Zhao XD, Zhou YT, Lu XJ. Sulforaphane enhances the activity of  
54 792 the Nrf2-ARE pathway and attenuates inflammation in OxyHb-  
55 793 induced rat vascular smooth muscle cells. *Inflamm Res*  
56 794 2013;**62**:857–63. doi:10.1007/s00011-013-0641-0



- 1  
2  
3 795 35 Zhao X, Wen L, Dong M, *et al.* Sulforaphane activates the cerebral  
4 796 vascular Nrf2–ARE pathway and suppresses inflammation to  
5 797 attenuate cerebral vasospasm in rat with subarachnoid hemorrhage.  
6 798 *Brain Res* 2016;**1653**:1–7. doi:10.1016/j.brainres.2016.09.035  
7  
8 799 36 Farrell B, Godwin J, Richards S, *et al.* The United Kingdom  
9 800 transient ischaemic attack (UK-TIA) aspirin trial: Final results. *J*  
10 801 *Neurol Neurosurg Psychiatry* Published Online First: 1951.  
11 802 doi:10.1136/jnnp.54.12.1044  
12  
13 803 37 Rankin J. Cerebral Vascular Accidents in Patients over the Age of  
14 804 60: III. Diagnosis and Treatment. *Scott Med J* Published Online  
15 805 First: 1957. doi:10.1177/003693305700200604  
16  
17 806 38 Quinn TJ, Dawson J, Walters MR, *et al.* Reliability of the modified  
18 807 rankin scale: A systematic review. *Stroke* Published Online First:  
19 808 2009. doi:10.1161/STROKEAHA.109.557256  
20  
21 809 39 Jennett B, Bond M. ASSESSMENT OF OUTCOME AFTER  
22 810 SEVERE BRAIN DAMAGE. A Practical Scale. *Lancet* Published  
23 811 Online First: 1975. doi:10.1016/S0140-6736(75)92830-5  
24  
25 812 40 Jennett B, Snoek J, Bond MR, *et al.* Disability after severe head  
26 813 injury: Observations on the use of the Glasgow Outcome Scale. *J*  
27 814 *Neurol Neurosurg Psychiatry* Published Online First: 1981.  
28 815 doi:10.1136/jnnp.44.4.285  
29  
30 816 41 Pace A, Mitchell S, Casselden E, *et al.* A subarachnoid  
31 817 haemorrhage-specific outcome tool. *Brain* 2018;**141**:1111–21.  
32 818 doi:10.1093/brain/awy003  
33  
34 819 42 Powell JH, Beckers K, Greenwood RJ. Measuring progress and  
35 820 outcome in community rehabilitation after brain injury with a new  
36 821 assessment instrument - The BICRO-39 scales. *Arch Phys Med*  
37 822 *Rehabil* Published Online First: 1998. doi:10.1016/S0003-  
38 823 9993(98)90265-9  
39  
40 824 43 van Heugten C, Rasquin S, Winkens I, *et al.* Checklist for cognitive  
41 825 and emotional consequences following stroke (CLCE-24):  
42 826 development, usability and quality of the self-report version. *Clin*  
43 827 *Neurol Neurosurg* 2007;**109**:257–62.  
44 828 doi:10.1016/j.clineuro.2006.10.002  
45  
46 829 44 Al-Tamimi YZ, Bhargava D, Feltbower RG, *et al.* Lumbar drainage  
47 830 of cerebrospinal fluid after aneurysmal subarachnoid hemorrhage: a  
48 831 prospective, randomized, controlled trial (LUMAS). *Stroke*  
49 832 2012;**43**:677–82. doi:10.1161/STROKEAHA.111.625731  
50  
51 833 45 Fisher CM, Kistler JP, Davis JM. Relation of cerebral vasospasm to  
52 834 subarachnoid hemorrhage visualized by computerized tomographic  
53 835 scanning. *Neurosurgery* 1980;**6**:1–  
54 836 9.<http://www.ncbi.nlm.nih.gov/pubmed/7354892>  
55  
56 837 46 Naidech AM, Janjua N, Kreiter KT, *et al.* Predictors and impact of

- 1  
2  
3 838 aneurysm rebleeding after subarachnoid hemorrhage. *Arch Neurol*  
4 839 2005;**62**:410–6. doi:10.1001/archneur.62.3.410
- 5  
6 840 47 Zhao J, Kobori N, Aronowski J, *et al.* Sulforaphane reduces infarct  
7 841 volume following focal cerebral ischemia in rodents. *Neurosci Lett*  
8 842 2006;**393**:108–12. doi:10.1016/j.neulet.2005.09.065
- 9  
10 843 48 Zhao X, Sun G, Zhang J, *et al.* Transcription factor Nrf2 protects  
11 844 the brain from damage produced by intracerebral hemorrhage.  
12 845 *Stroke* 2007;**38**:3280–6. doi:10.1161/STROKEAHA.107.486506
- 13  
14 846 49 Alfieri A, Srivastava S, Siow RCM, *et al.* Sulforaphane  
15 847 preconditioning of the Nrf2/HO-1 defense pathway protects the  
16 848 cerebral vasculature against blood-brain barrier disruption and  
17 849 neurological deficits in stroke. *Free Radic Biol Med* 2013;**65**:1012–  
18 850 22. doi:10.1016/j.freeradbiomed.2013.08.190
- 19  
20 851 50 Sharma V, McNeill JH. To scale or not to scale: The principles of  
21 852 dose extrapolation. *Br. J. Pharmacol.* 2009. doi:10.1111/j.1476-  
22 853 5381.2009.00267.x
- 23  
24 854 51 Reagan-Shaw S, Nihal M, Ahmad N. Dose translation from animal  
25 855 to human studies revisited. *FASEB J* Published Online First: 2007.  
26 856 doi:10.1096/fj.07-9574LSF
- 27  
28 857 52 Clarke JD, Hsu A, Williams DE, *et al.* Metabolism and tissue  
29 858 distribution of sulforaphane in Nrf2 knockout and wild-type mice.  
30 859 *Pharm Res* 2011;**28**:3171–9. doi:10.1007/s11095-011-0500-z
- 31  
32 860 53 Jazwa A, Rojo AI, Innamorato NG, *et al.* Pharmacological  
33 861 Targeting of the Transcription Factor Nrf2 at the Basal Ganglia  
34 862 Provides Disease Modifying Therapy for Experimental  
35 863 Parkinsonism. *Antioxid Redox Signal* 2011;**14**:2347–60.  
36 864 doi:10.1089/ars.2010.3731
- 37  
38 865 54 Kumar G, Shahripour RB, Harrigan MR. Vasospasm on transcranial  
39 866 Doppler is predictive of delayed cerebral ischemia in aneurysmal  
40 867 subarachnoid hemorrhage: a systematic review and meta-analysis.  
41 868 2016;**124**:1257–64. doi:10.3171/2015.4.JNS15428.
- 42  
43 869 55 Tam AKH, Ilodigwe D, Li Z, *et al.* Global cerebral atrophy after  
44 870 subarachnoid hemorrhage: a possible marker of acute brain injury  
45 871 and assessment of its impact on outcome. *Acta Neurochir Suppl*  
46 872 Published Online First: 2013. doi:10.1007/978-3-7091-1192-5\_5
- 47  
48 873 56 Nicci Campbell, Carl Verschuur, Sophie Mitchell, Orlaith  
49 874 McCaffrey, Lewis Deane, Hannah Taylor, Rory Smith, Lesley  
50 875 Foulkes, James Glazier, Angela Darekar, Mark E Haacke, Diederik  
51 876 Bulters and IG. Hearing impairment after subarachnoid  
52 877 haemorrhage. *Ann Clin Transl Neurol* 2018;**In press**.  
53 878 doi:10.1002/acn3.714
- 54  
55 879 57 Vergouwen MDI, Vermeulen M, van Gijn J, *et al.* Definition of  
56 880 delayed cerebral ischemia after aneurysmal subarachnoid

- 1  
2  
3 881 hemorrhage as an outcome event in clinical trials and observational  
4 882 studies: proposal of a multidisciplinary research group. *Stroke*  
5 883 2010;**41**:2391–5. doi:10.1161/STROKEAHA.110.589275  
6  
7 884 58 Alaraj A, Hussein AE, Esfahani DR, *et al.* Reducing length of stay  
8 885 in aneurysmal subarachnoid hemorrhage: A three year institutional  
9 886 experience. *J Clin Neurosci* 2017;**42**:66–70.  
10 887 doi:10.1016/j.jocn.2017.03.049  
11  
12 888 59 Teasdale GM, Drake CG, Hunt W, *et al.* A universal subarachnoid  
13 889 haemorrhage scale: report of a committee of the world federation of  
14 890 Neurosurgical societies. *J. Neurol. Neurosurg. Psychiatry*. 1988.  
15 891 doi:10.1136/jnnp.51.11.1457  
16  
17 892 60 Jaja BNR, Saposnik G, Lingsma HF, *et al.* Development and  
18 893 validation of outcome prediction models for aneurysmal  
19 894 subarachnoid haemorrhage: The SAHIT multinational cohort study.  
20 895 *BMJ* Published Online First: 2018. doi:10.1136/bmj.j5745  
21  
22 896  
23  
24  
25  
26  
27  
28  
29  
30  
31  
32  
33  
34  
35  
36  
37  
38  
39  
40  
41  
42  
43  
44  
45  
46  
47  
48  
49  
50  
51  
52  
53  
54  
55  
56  
57  
58  
59  
60

# BMJ Open

## A study protocol for SFX-01 After Subarachnoid haemorrhage (SAS): A multi-centre randomised double-blinded, placebo controlled trial

|                                 |                                                                                                                                                                                                                                                                                                                 |
|---------------------------------|-----------------------------------------------------------------------------------------------------------------------------------------------------------------------------------------------------------------------------------------------------------------------------------------------------------------|
| Journal:                        | <i>BMJ Open</i>                                                                                                                                                                                                                                                                                                 |
| Manuscript ID                   | bmjopen-2018-028514.R2                                                                                                                                                                                                                                                                                          |
| Article Type:                   | Protocol                                                                                                                                                                                                                                                                                                        |
| Date Submitted by the Author:   | 26-Dec-2019                                                                                                                                                                                                                                                                                                     |
| Complete List of Authors:       | Zolnourian, Ardalan; University of Southampton, Clinical Neuroscience; University Hospital Southampton NHS Foundation Trust, Franklin, Stephen<br>Galea, Ian; University of Southampton Faculty of Medicine, Experimental Neurology<br>Bulters, Diederik ; University Hospital Southampton NHS Foundation Trust |
| <b>Primary Subject Heading</b>: | Surgery                                                                                                                                                                                                                                                                                                         |
| Secondary Subject Heading:      | Medical management, Evidence based practice, Neurology, Surgery, Pharmacology and therapeutics                                                                                                                                                                                                                  |
| Keywords:                       | Randomised controlled trial, Subarachnoid haemorrhage, Nrf2, Sulforaphane, Delayed cerebral ischaemia                                                                                                                                                                                                           |
|                                 |                                                                                                                                                                                                                                                                                                                 |

SCHOLARONE™  
Manuscripts

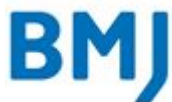

I, the Submitting Author has the right to grant and does grant on behalf of all authors of the Work (as defined in the below author licence), an exclusive licence and/or a non-exclusive licence for contributions from authors who are: i) UK Crown employees; ii) where BMJ has agreed a CC-BY licence shall apply, and/or iii) in accordance with the terms applicable for US Federal Government officers or employees acting as part of their official duties; on a worldwide, perpetual, irrevocable, royalty-free basis to BMJ Publishing Group Ltd ("BMJ") its licensees and where the relevant Journal is co-owned by BMJ to the co-owners of the Journal, to publish the Work in this journal and any other BMJ products and to exploit all rights, as set out in our [licence](#).

The Submitting Author accepts and understands that any supply made under these terms is made by BMJ to the Submitting Author unless you are acting as an employee on behalf of your employer or a postgraduate student of an affiliated institution which is paying any applicable article publishing charge ("APC") for Open Access articles. Where the Submitting Author wishes to make the Work available on an Open Access basis (and intends to pay the relevant APC), the terms of reuse of such Open Access shall be governed by a Creative Commons licence – details of these licences and which [Creative Commons](#) licence will apply to this Work are set out in our licence referred to above.

Other than as permitted in any relevant BMJ Author's Self Archiving Policies, I confirm this Work has not been accepted for publication elsewhere, is not being considered for publication elsewhere and does not duplicate material already published. I confirm all authors consent to publication of this Work and authorise the granting of this licence.

1  
2  
3  
4 1 **A study protocol for SFX-01 After Subarachnoid haemorrhage**  
5 2 **(SAS): A multi-centre randomised double-blinded, placebo**  
6 3 **controlled trial**  
7 4  
8 5  
9 6

10 6 **Date and version:** 16<sup>th</sup> May 2018, Version 7  
11 7

12 8 Ardalan Zolnourian<sup>a,c</sup>, Stephen Franklin<sup>b</sup>, Ian Galea<sup>c\*</sup>, Diederik Bulters<sup>a,c\*</sup>  
13 9

14 10 <sup>a</sup> Department of Neurosurgery, University Hospital Southampton, Tremona Road,  
15 11 Southampton, SO16 6YD  
16 12

17 13 <sup>b</sup> Evgen Pharma, Liverpool Science Park IC2, 146 Brownlow Hill, Liverpool  
18 14 L3 5RF  
19 15

20 16 <sup>c</sup> Clinical Neurosciences, Clinical and Experimental Sciences, Faculty of Medicine,  
21 17 University of Southampton, Tremona Road, Southampton, SO16 6YD  
22 18

23 19 \* Joint senior authors  
24 20  
25 21  
26 22  
27 23  
28 24

29 25 **Ardalan Zolnourian:** Principal investigator, University Hospital Southampton  
30 26  
31 27

32 28 **Stephen Franklin:** Chief Executive Officer of Evgen Pharma  
33 29  
34 30

35 31 **Ian Galea:** Co-investigator, University of Southampton  
36 32  
37 33

38 34 **Diederik Bulters:** Chief investigator, University Hospital Southampton  
39 35  
40 36

41 37 **Statistician:** David Stone  
42 38  
43 39

44 40 **Clinical trials coordinating centre:** The Clinical Trials Company Team  
45 41  
46 42

47 43 **Steering committee:** Diederik Bulters, Thomas Morris  
48 44  
49 45

50 46 **Corresponding author:** dbulters@nhs.net  
51 47  
52 48  
53 49  
54 50  
55 51  
56 52  
57 53  
58 54  
59 55  
60 56

## 50 **Abstract**

### 51 **Introduction**

54 Subarachnoid haemorrhage from a ruptured cerebral aneurysm carries high morbidity  
55 and mortality. Despite huge advances in techniques to secure the aneurysm, there has  
56 been little progress in the treatment of the deleterious effects of the haemorrhage.

58 Sulforaphane is an Nrf2 inducer with anti-oxidant and anti-inflammatory properties. It  
59 has been shown to improve clinical outcome in experimental models of SAH, but is  
60 unstable. SFX-01 (Evgen Pharma) is a novel composition comprised of synthetic  
61 sulforaphane stabilised within an  $\alpha$ -cyclodextrin complex. On ingestion, the complex  
62 releases sulforaphane making SFX-01 an ideal vehicle for delivery of sulforaphane.

### 64 **Methods and analysis**

66 The objective of the study is to assess the safety, pharmacokinetics and efficacy of  
67 SFX-01. This is a prospective, multi-centre, randomised, double-blind placebo-  
68 controlled trial in patients aged 18-80 years with aneurysmal subarachnoid  
69 haemorrhage in the previous 48 hours. 90 patients will be randomised to receive SFX-  
70 01 (300mg) or placebo twice-daily for up to 28 days.

72 Safety will be assessed using blood tests and adverse event reporting.  
73 Pharmacokinetics will be assessed based on paired blood and CSF sulforaphane levels  
74 on day seven. A subgroup will have hourly samples taken during six hours post-  
75 dosing on days one and seven. Pharmacodynamics will be assessed by haptoglobin  
76 and malondialdehyde levels, and maximum flow velocity of middle cerebral artery  
77 will be measured by transcranial Doppler ultrasound.

79 Clinical outcomes will be assessed at days 28, 90 and 180 with mRS, GOSE, SAHOT,  
80 SF-36, BICRO-39 and CLCE-24. MRI at six months including quantitative  
81 susceptibility mapping and volumetric T1 will measure iron deposition and cortical  
82 volume.

84 Safety, CSF sulforaphane concentration and middle cerebral artery flow velocity will  
85 be primary outcomes and all others secondary.

### 87 **Ethics and dissemination**

88 Ethical approval was obtained from South Central Hampshire A committee.  
89 Outcomes of the trial will be submitted for publication in a peer reviewed journal.

90 **Trial registration number:** NCT02614742 ; Pre-results

91

92

93

94

95

## 96 **Strengths and limitations of this study**

- 97 • **A strength of this study is that it tests a new class of drug not previously used**
- 98 **after human SAH.**
- 99 • **It is at low risk of bias due to placebo control and appropriate blinding.**
- 100 • **The study design includes multiple mechanistic outcomes to give deeper**
- 101 **understanding of any clinical findings.**
- 102 • **The study includes multiple novel outcome measures and MRI sequences.**
- 103 **While these may provide new insights, some are exploratory due to limited**
- 104 **experience with them in SAH to date.**
- 105 • **It is a multicentre trial, and its results should be generalizable to patients**
- 106 **with high volume SAH in neurosurgical units in the UK, although due to the**
- 107 **complexity of its design, it has been limited to three centres to ensure high**
- 108 **quality outcome measurement.**

## 110 **Introduction**

111 Spontaneous Subarachnoid Haemorrhage (SAH) is a devastating cerebrovascular  
112 injury with an incidence of 9.1 per 100,000 population [1]. It affects around 7000  
113 patients in the UK annually. Around 85% are due to ruptured intracranial aneurysms  
114 [2]. The incidence is age related peaking at 52 years. SAH carries a high overall  
115 mortality rate of up to 67% [3], and only half of the survivors are able to live  
116 independently [4]. It therefore has a high burden on society due to the loss of  
117 productivity and resources [5].

118  
119 Conventionally following SAH, treatment is primarily directed to securing the  
120 aneurysm and prevent further re-bleeding. This however does nothing to ameliorate  
121 the morbidity and mortality due to the haemorrhage. The only approved treatment is  
122 nimodipine [6]. However, its effects are small and poor outcome remains a significant  
123 problem [7]. Moreover, even in survivors considered to have made a good recovery,  
124 neurocognitive deficits are common leading to extensive problems with social  
125 reintegration and functioning in the workplace [5].

126  
127 The mechanism of injury following SAH is multifactorial[8]. Early brain injury (EBI)  
128 refers to the processes occurring within the first 72 hours which include blood-brain  
129 barrier (BBB) dysfunction [9], cerebral oedema [10][11], neuronal cell death [12],  
130 altered ionic homeostasis, excitotoxicity, thrombin activation [13], vascular integrity  
131 degradation [14], oxidative stress [15], and inflammation [16]. However, despite the  
132 terminology, mechanisms such as oxidative stress and inflammation are not limited to  
133 this early period. They continue to worsen beyond the first three days, at the same  
134 time as CSF free haemoglobin (Hb) concentration rises markedly as it is released  
135 from the clot and mechanisms to dispose of Hb are saturated. It is also in this delayed  
136 phase when cerebral vasospasm occurs, affecting both micro- [17] and  
137 microvasculature [18].

138  
139 Sulforaphane (SFN) is known to upregulate the nuclear factor erythroid 2-related  
140 factor 2 (Nrf2) pathway. Nrf2 is a redox-sensitive transcription factor that binds to a  
141 specific DNA site, the anti-oxidant response element, upstream of genes encoding  
142 detoxifying and anti-oxidant enzymes [19] [20]. Some of these enzymes include



1  
2  
3 143 glutathione S-transferases (GSTs), NAD(P)H-quinone oxidoreductase 1 (NQO1) and  
4 144 haem oxygenase 1 (HO-1) [19]. During physiological conditions Nrf2 is bound to the  
5 145 Kelch-like ECH associated protein 1 (KEAP1) in the cytoplasm. In response to stress  
6 146 such as SAH, Nrf2 is released from KEAP1 and then translocates to the nucleus  
7 147 leading to enhanced gene transcription [21].  
8 148

9 149 Nrf2 also upregulates haptoglobin (Hp), an acute phase glycoprotein found in plasma  
10 150 [22], as well as cerebrospinal fluid (CSF) [23]. Hp is part of an important Hb  
11 151 scavenging pathway after SAH. It binds tightly to free Hb, and this Hb-Hp complex is  
12 152 taken up by CD163-positive macrophages [24]. This pathway is saturated after SAH  
13 153 [23] and upregulation of Hp represents a possible therapeutic avenue [25]. Nrf2 also  
14 154 regulates degradation of red blood cells, and metabolism of haem and iron through  
15 155 transcriptional upregulation of CD36 [26], haemopexin [27], HO-1 [28] and ferritin  
16 156 [29].  
17 157

18 158 Nrf2 is expressed in the central nervous system (CNS) and is upregulated in response  
19 159 to inflammation and cerebral insults [30]. Nrf2 knockout is associated with a more  
20 160 pronounced inflammatory response *in vitro* [31] and *in vivo* [32], and the increased  
21 161 inflammatory response is associated with more brain oedema, cell death and poorer  
22 162 neurological recovery [33]. SFN increases HO-1, NQO1, and GST- $\alpha$ 1 levels and  
23 163 reduces IL-1 $\beta$ , IL-6, and TNF- $\alpha$  [34]. It leads to a reduction in vasospasm and  
24 164 improves neurological recovery [32] [35].  
25 165

26 166 SFN has a relatively short half-life rendering it impractical for clinical use. SFX-01  
27 167 (Evgen Pharma) is a novel new agent comprising SFN complexed with  $\alpha$ -cyclodextrin  
28 168 which is suitable for clinical use. On ingestion, SFN is released from the  $\alpha$ -  
29 169 cyclodextrin and is an effective method to deliver SFN. While cyclodextrin catalyses  
30 170 the reaction with the intermediate that is used to create the sulforaphane, it serves a  
31 171 very important purpose of creating a 'scaffold' around sulforaphane, increasing its  
32 172 shelf-life and half-life. In two Phase I trials (NCT01948362, NCT02055716) no  
33 173 serious adverse events were reported in healthy volunteers. Here we describe the  
34 174 protocol for a phase II trial of SFX-01 in patients who have suffered a SAH.  
35 175

## 36 176 **Objectives**

37 177  
38 178 The objective of the study is to assess the safety, pharmacokinetics and efficacy of  
39 179 SFX-01.  
40 180

## 41 181 **Methods**

### 42 182 ***Trial design***

43 183  
44 184  
45 185 This is a prospective, double-blind, parallel group, randomised controlled trial  
46 186 comparing SFX-01 (300 mg) taken orally as capsules or as a suspension via a  
47 187 nasogastric tube (NG) twice-daily for up to 28 days *versus* placebo in patients with  
48 188 SAH within 48 hours of enrolment.  
49 189

50 190 The treatment window of 48 hours was selected as the best compromise between  
51 191 competing factors. SFX-01 has pleiotropic actions against multiple mechanisms each

1  
2  
3 192 with different temporal profiles. Since SAH is an acute unpredictable event, the  
4 193 earliest one would be able to start treatment is soon after ictus, on admission into  
5 194 hospital. This would give optimal protection against early brain injury. Initiating  
6 195 treatment would still be justified up to 72 hours post-ictus, after which delayed  
7 196 cerebral ischaemia (DCI) occurs, such that a delay of more than 72 hours would be  
8 197 expected to undermine treatment efficacy. Within the initial 72 hours, earlier  
9 198 treatment would allow more time for Nrf2 pathway activation and expression of its  
10 199 transcriptome to protect against delayed events, as well as provide more opportunity  
11 200 for SFX-01 to act against early brain injury. On the other hand the earlier one  
12 201 stipulates treatment would start, the more patients one will exclude from the study. No  
13 202 animal studies have been conducted to investigate the timing of sulforaphane  
14 203 administration, and even if available, extrapolation of timing from animal models has  
15 204 its limitations due to the much quicker clot resorption in rodents. After considering all  
16 205 these factors, it was decided to start SFX-01 treatment at the earliest possible  
17 206 opportunity after SAH, yet still allow patients to be included if their presentation was  
18 207 delayed to some extent, to ensure generalizability to real clinical practice where  
19 208 delays in admission to tertiary centres are not uncommon. An audit of the lead study  
20 209 centre showed that most patients are admitted within 48 hours, leading to the adoption  
21 210 of SAH within 48 hours as the inclusion criterion, striking the best compromise  
22 211 between the practicality of recruitment and the need to start treatment early.  
23 212

24 213 Detailed pharmacovigilance will inform the safety of SFX-01. Pharmacokinetics will  
25 214 be determined by measuring levels of SFN and its metabolites in CSF and blood at  
26 215 day seven in all patients; a more detailed profile will be obtained in a subgroup of up  
27 216 to 12 patients who will have hourly blood and CSF samples for six hours after dosing  
28 217 on days one and seven. Pharmacodynamics will be assessed with blood Hp and  
29 218 malondialdehyde (MDA) levels, and middle cerebral artery (MCA) flow velocity as  
30 219 measured on transcranial Doppler (TCD) ultrasound as an estimate of large cerebral  
31 220 artery spasm. Longer term outcome will be assessed using validated outcome scales,  
32 221 at day 28 using Modified Rankin Scale (mRS) ([36] [37] [38] , Glasgow Outcome  
33 222 Score (GOSE) [39][40] and the SAH Outcome Tool (SAHOT) [41] as well as at day  
34 223 90 and 180 using the mRS, GOSE, SAHOT, Brain Injury Community Rehabilitation  
35 224 Outcome Scales (BICRO-39) [42] and the Check List for Cognitive and Emotional  
36 225 consequences following stroke (CLCE-24) [43].  
37 226

### 38 227 *Patient and public involvement*

39 228

40 229 The overall design of the study including planned investigations i.e. lumbar puncture  
41 230 (LP), magnetic resonance imaging (MRI), blood tests, outcome questionnaires, the  
42 231 treatment methods and the consent procedures were discussed in a local SAH support  
43 232 group consisting of individuals with a previous history of SAH as well as their  
44 233 relatives. The meeting was led by the chief investigator, a consultant neurovascular  
45 234 surgeon, and the neurovascular specialist nurse who are normally the main point of  
46 235 contact for SAH patients. The results were used to inform planning of the trial.  
47 236 Particular attention was given to the study lumbar puncture which was felt to be  
48 237 justified on the grounds that the majority of patients will undergo CSF diversion for  
49 238 clinical reasons anyway, and evidence from a randomised controlled trial that CSF  
50 239 diversion in all Fisher 3&4 patients causes no harm and appears to provide short term  
51 240 symptomatic benefit [44]. The meeting was also beneficial in shaping and improving  
52 241 the patient information sheet and consent forms.

1  
2  
3 2424 243 ***Study setting***

5 244

7 245 This is a multicentre study conducted in regional neurosciences centres with specialist  
8 246 services to treat aneurysmal SAH. Patients will be identified at referral to the  
9 247 admitting neurosurgical or neurointensive care units. After informed consent, dosing  
10 248 and study interventions will occur in the neurosciences centre until patients are  
11 249 discharged to either home or their local hospitals. There are three recruiting centres;  
12 250 University Hospital Southampton, Royal Infirmary of Edinburgh and the Royal  
13 251 London Hospital. Upon discharge, follow-up may take place in clinic, or at visits to  
14 252 district general hospitals and rehabilitation centres, or patients' residences.  
15 253

16 253

17 254 **Eligibility Criteria**

18 255

19 256 ***Inclusion criteria***

20 257

- 22 258 1. Patients with radiological evidence of spontaneous aneurysmal SAH
- 23 259 2. Fisher grade 3 or 4 on CT
- 24 260 3. Definitive treatment of aneurysm has not been ruled out
- 25 261 4. Previously living independently
- 26 262 5. In the opinion of the investigator, the delay from ictus to randomisation and  
27 263 initiation of trial medication will not exceed 48 hours
- 28 264 6. Aged 18 to 80 years
- 29 265 7. In the opinion of the investigator it will be possible to obtain Informed Consent  
30 266 from the Patient, Personal Legal Representative or Professional Legal  
31 267 representative within 24 hours of first dose

32 268

33 269 ***Exclusion criteria***

34 270

- 35 271 1. Traumatic SAH
- 36 272 2. Fisher grade 1 or 2
- 37 273 3. SAH diagnosed on LP with no evidence of blood on CT
- 38 274 4. Decision not to treat aneurysm has been made
- 39 275 5. Plan to withdraw treatment
- 40 276 6. Significant kidney disease as defined as plasma creatinine  $\geq 2.5$ mg/dL (221  
41 277  $\mu\text{mol/l}$ )
- 42 278 7. Liver disease as defined as total bilirubin  $\geq 2$ -fold the upper limit of normal, as  
43 279 measured by the local laboratory
- 44 280 8. Females who are pregnant or lactating
- 45 281 9. Participants enrolled in another interventional research trial in the last 30 days
- 46 282 10. Patients for whom it is known, at the time of screening, that clinical follow-up will  
47 283 not be feasible
- 48 284 11. Patients unwilling to use two forms of contraception (one of which being a barrier  
49 285 method) for 90 days (men) or 30 days (women) after the last trial medication dose
- 50 286 12. Known hypersensitivity to any component of a SFN containing product including  
51 287 broccoli

52 288

53 289 Recruitment will be limited to Fisher grade 3 and 4 SAH. These patients represent the  
54 290 majority of aneurysmal SAH. They have a higher volume of haemorrhage with a

291 poorer outcome and more delayed neurological deficits [45]. They are therefore  
292 mechanistically and clinically expected to derive greatest benefit from SFX-01. In  
293 addition to using Fisher scale, all baseline CT scans will undergo volumetric analysis  
294 of blood load, which are more objective and reliable than any versions of the Fisher  
295 scale.

296  
297 Inclusion of patients with unsecured aneurysms would risk a high incidence of  
298 rebleeding in the study. Rebleeding is associated with exceedingly bad outcomes [46],  
299 masking any effect from SFX-01. However, since not all aneurysms are secured  
300 within 48 hours, there will be no requirement for the aneurysm to have been secured  
301 prior to enrolment. Instead patients in whom treatment of the aneurysm has been ruled  
302 out due to poor clinical status will be excluded.

303  
304 Although there are no known risks to kidney or liver, due to the relative inexperience  
305 with SFX-01 in humans, patients with liver or kidney problems will be excluded.

## 306 307 **Intervention**

### 308 309 ***Trial medication***

310  
311 SFX-01 (active 300 mg capsule) or placebo ( $\alpha$ -cyclodextrin only capsule) will be  
312 taken orally or as a suspension via a nasogastric tube (NG) twice daily for up to 28  
313 days. Pharmagra manufacture the active pharmaceutical ingredient (API) in North  
314 Carolina, US. The API is then encapsulated at Quotient in Reading, UK. The API  
315 manufacture has been audited by the FDA and Evgen pharma. SFX-01 and placebo  
316 capsules as well as their contents will be identical in appearance. They will be stored  
317 at 2-8 degrees Celsius.

318  
319 Animal studies in ischaemic stroke, intracerebral haemorrhage and SAH have all used  
320 5 mg/kg dose of SFN in rodents [32] [47] [48] [49]. Conversion of animal doses to  
321 humans using body surface area, as has been widely recommended [50] [51], yields a  
322 human dose of 50 mg SFN. This is equivalent to 300 mg of SFX-01 containing 46.15  
323 mg of SFN. In the clinical studies conducted to date, SFX-01 has been shown to be  
324 well tolerated at doses of 600mg once daily and 300mg twice daily with no serious  
325 adverse effects. Therefore no further dose ranging studies were performed.

### 326 327 ***De-escalation from the trial regimen***

328  
329 In the event of tolerability problems whilst the patient is in the neurosurgical centre,  
330 the Investigator will assess whether simple measures to ease the effects of the adverse  
331 event(s) may be implemented (i.e. antacid in the case of GI irritation or anti-emetic in  
332 the event of nausea).

333 The investigator will also assess whether or not the adverse event(s) could be related  
334 to the trial medication and severe enough to warrant a dose frequency reduction. In  
335 the first instance the investigator may consider missing one dose. If a dose frequency  
336 reduction is warranted, from that point onwards the second dose of the day will be  
337 omitted; a dose frequency increase back to twice daily will not be permitted.

338  
339 If tolerability problems continue then the investigational medication will be stopped;  
340 patients will continue in the study and complete the study visits. The staged dose

1  
2  
3 341 frequency de-escalation (dropping to once daily) will not be carried out after  
4 342 discharge from the neurosurgical centre; if tolerability problems occur after discharge,  
5 343 medication will be stopped; patients will continue in the study and complete the study  
6 344 visits in accordance with the schedule of assessments.  
7  
8 345

### 9 346 *Treatment compliance*

10 347  
11 348 Compliance with treatment will be recorded during the inpatient hospital stay by  
12 349 health care professionals and/or a member of the research team. On discharge to the  
13 350 usual residence, responsibility for this will be transferred to the patient or their  
14 351 Personal Legal Representative, aided by detailed instructions. In the event of  
15 352 discharge to a rehabilitation unit or patient local hospital, written instructions will be  
16 353 provided on discharge and verbal communication with the clinical team will ensure  
17 354 compliance.  
18 355

19  
20 356 All patients will be discharged with a patient diary which will be filled in and  
21 357 collected at day 28. Compliance will be further monitored by drug reconciliation.  
22 358 Patients will be asked to return the medication bottle and any residual contents at the  
23 359 day 28 visit. At this time any residual tablets will be counted and recorded.  
24 360

### 25 361 *Concomitant treatment*

26 362  
27 363 There are no known drug interactions, and participation in the trial will not alter  
28 364 routine treatment of SAH. Participation in other interventional research studies will  
29 365 not be allowed until after the last follow up visit.  
30 366

## 31 367 Outcomes

### 32 368 Primary end-points

### 33 369 *Safety*

34 370  
35 371  
36 372  
37 373 To evaluate the safety of up to 28 days of SFX-01 dosed at up to an equivalent of  
38 374 92mg SFN per day.  
39 375

40 376 Prior to the start of this study, the trial medication had only been used in healthy  
41 377 individuals and not in a patient population. Therefore safety will be one of the main  
42 378 objectives of this study. This will be evaluated through routine tests (full blood count,  
43 379 urea and electrolytes, coagulation screen, liver function tests, and urine microscopy)  
44 380 at baseline, post-dose, day seven and day 28 as well as close monitoring of patients  
45 381 for any side-effects or adverse events. Adverse events will be coded following  
46 382 MEDDRA and followed up until resolution and graded for severity. Incidence of dose  
47 383 de-escalation or discontinuation will also be reported.  
48 384

### 49 385 *Pharmacokinetic*

50 386  
51 387 To detect the presence of SFN and its metabolites in CSF and blood.  
52 388

53 389 Animal models have shown that SFN crosses the blood-brain barrier and can therefore  
54 390 be detected in the brain [52] [53] There is some variation in the levels achieved in

391 these studies, and it has not been studied in humans. All patients will have a paired  
392 CSF/blood sample taken at seven days post-ictus. This will be via a LP unless the  
393 patient has an external ventricular drain (EVD) for their clinical care in which case it  
394 will be obtained from the EVD. In addition, up to 12 patients with an EVD will be  
395 asked to consent to hourly CSF and blood samples for six hours after dosing on days  
396 one and seven. Hourly CSF sampling will be performed by trained study personnel  
397 using a bespoke sterile closed cascade of syringes so that the EVD line is accessed  
398 directly only once to reduce the risk of infection. Sample collection and processing  
399 are detailed in specific study operating procedures.

### 401 *Vasospasm*

402  
403 To determine if a minimum of seven days treatment with SFX-01 reduces MCA peak  
404 flow velocity following SAH.

405  
406 TCD ultrasound will be used to measure the MCA, ICA and ECA maximum flow  
407 velocity and the Lindegaard ratio will be calculated. TCDs will be performed on  
408 alternate daily basis including at baseline. They will be performed for at least seven  
409 days or until no longer clinically indicated. Blood flow velocity is measured in  
410 cm/second and is inversely related to the luminal diameter of the vessel. The greater  
411 this value the more likely the degree of narrowing or spasm in the vessel. It has a  
412 good predictive value for DCI. A recent systematic review and meta-analysis, which  
413 pooled data from 2870 patients, showed a sensitivity of 90%, specificity of 71%, and  
414 negative and positive predictive values of 92% and 57% respectively [54].

### 416 Secondary end-points

#### 418 *Pharmacodynamic*

#### 420 *CSF and blood – Haptoglobin and Malondialdehyde*

421  
422 Hp represents a major Hb detoxification pathway and is upregulated by Nrf2. MDA is  
423 a measure of oxidative stress. Hp and MDA will be measured in blood at baseline,  
424 day seven and day 28, and in CSF on day seven. A local audit at the main study  
425 neurosurgical centre showed that approximately 1/3 of patients have an EVD sited as  
426 part of their routine clinical care to treat hydrocephalus. In these patients additional  
427 samples will be obtained. This will allow investigation of the temporal profile of Hp  
428 level and oxidative stress. Additionally, there will be exploratory investigations using  
429 proteomics, transcriptomics and genomics using CSF and blood samples.

#### 431 *MRI – iron and brain volume*

432  
433 All patients will have MRI 180 days after SAH. Brain volume on T1 sequences will  
434 be measured, since this has been shown to correlate with outcome [55]. Cortical iron  
435 content will be assessed using quantitative susceptibility mapping after susceptibility  
436 weighted MR imaging, which predominantly measures siderotic iron deposits [56].  
437 Iron is a major component of Hb, and it is unknown what effects SFX-01, SFN or  
438 increased Hp binding of Hb may have on the downstream iron pathway.

#### 440 *Clinical outcome*

- 1  
2  
3 441  
4 442 • mRS at seven days, discharge, 28, 90 and 180 days.  
5 443 • Incidence of DCI defined as a new focal deficit or reduction in GCS (by two  
6 444 points or more) if not explained by other causes (i.e. re-bleed, hydrocephalus,  
7 445 seizure, meningitis, sepsis or hyponatraemia) [57]  
8 446 • Incidence of new cerebral infarct on CT or MRI  
9 447 • Institution of hypertensive therapy for presumed DCI  
10 448 • SF-36 quality of life survey at 28, 90 & 180 days  
11 449 • CLCE-24 and BICRO-39 at 90 & 180 days  
12 450 • SAHOT and GOSE at 28, 90 & 180 days  
13 451 • Length of acute hospital stay  
14 452 • Discharge destination  
15 453

16 454 A number of measures of efficacy have been selected reflecting the most common  
17 455 stroke outcome assessment (mRS), the most common brain injury assessment  
18 456 (GOSE), the most common quality of life survey (SF-36) and the only SAH specific  
19 457 outcome tool [41] to determine the most sensitive tool and make estimates of effect  
20 458 size. SAHOT includes 56 items dealing with cognitive, physical, and  
21 459 behavioural/psychological consequences of SAH, developed in a SAH focus group by  
22 460 patients and experts in the field. This outcome tool has been validated and proposed  
23 461 as a more sensitive and responsive tool in SAH [41]. All these tools will be  
24 462 administered by research nurses or doctors trained in mRS and GOSE in person, or in  
25 463 the event this is not feasible, by phone.  
26 464

27 465 A number of short term patient outcomes related to the incidence of DCI are included  
28 466 *a priori* such as incidence of infarction as adjudicated by a blinded consultant  
29 467 neuroradiologist (with baseline CT and follow up MRI), and institution of  
30 468 hypertensive therapy which is defined as institution of inotropes to increase blood  
31 469 pressure in intensive care. Several simple outcomes including length of stay and  
32 470 discharge destination that have been associated with outcome [58] are also included *a*  
33 471 *priori* in the event any patients are lost to longer term follow up.  
34 472

35 473 **A summary of all the key study activities with their specific time**  
36 474 **points are outlined in table 1.**

37 475  
38 476 **Table 1. Schedule of assessments**  
39 477

| Time points <sup>1</sup>   | D 0-2 | D 1-3<br>(12-24<br>post-<br>dose) | Ongoing<br>assessment<br>(Alternate days) <sup>6</sup><br>(+/-1) | D 7<br>(+/-1) | Discharge<br>(-2) | D 28<br>(-6/+2) | D 90<br>(+/-14) | D 180<br>(+/- 28) |
|----------------------------|-------|-----------------------------------|------------------------------------------------------------------|---------------|-------------------|-----------------|-----------------|-------------------|
| Study procedures           |       |                                   |                                                                  |               |                   |                 |                 |                   |
| Consent                    | X     |                                   |                                                                  |               |                   |                 |                 |                   |
| Inclusion/exclusion        | X     |                                   |                                                                  |               |                   |                 |                 |                   |
| WFNS grading               | X     |                                   |                                                                  |               |                   |                 |                 |                   |
| IMP treatment              | X     |                                   |                                                                  |               |                   |                 |                 |                   |
| Safety bloods <sup>2</sup> | X     | X                                 | X                                                                | X             | X                 | X               |                 |                   |
| Safety urine               | X     |                                   |                                                                  | X             | X                 | X               |                 |                   |
| Lipid profile              | X     |                                   |                                                                  | X             | X                 | X               |                 |                   |
| Coagulation screen         |       |                                   |                                                                  |               |                   |                 |                 |                   |

|                                            |   |   |   |   |   |   |   |   |
|--------------------------------------------|---|---|---|---|---|---|---|---|
| TCD readings <sup>3</sup>                  |   | X | X | X |   |   |   |   |
| HP, MDA (Blood/CSF) <sup>4</sup>           | X |   |   | X |   | X |   |   |
| SFN & metabolites (Blood/CSF) <sup>5</sup> |   |   |   | X |   |   |   |   |
| Pregnancy test                             | X |   |   |   |   |   |   |   |
| mRS                                        |   |   |   | X | X | X | X | X |
| GOSE                                       |   |   |   |   |   | X | X | X |
| SAHOT                                      |   |   |   |   |   | X | X | X |
| SF-36                                      |   |   |   |   |   | X | X | X |
| BICRO-39                                   |   |   |   |   |   |   | X | X |
| CLCE-24                                    |   |   |   |   |   |   | X | X |
| MRI                                        |   |   |   |   |   |   |   | X |

- 1- Ictus is defined as the onset of symptoms/haemorrhage and is referred to as day 0.
- 2- Safety bloods include: Biochemistry: Sodium, Potassium, Urea, Creatinine, Glucose, Calcium, Total Bilirubin, Alkaline Phosphatase, Alanine Transaminase, Albumin, C-Reactive Protein, and Haematology including Haemoglobin, White Blood Cell Count, Neutrophils (Absolute), Lymphocytes (Absolute), Platelets. These will be done at least on alternate days until no longer clinically indicated.
- 3- TCDs will be performed at baseline before day 3 and will be repeated on alternate daily basis until at least day 7 or where clinically indicated.
- 4- Hp and MDA will be assayed in both CSF and blood at baseline, where possible i.e if patient has an EVD fitted this will be measured in the CSF and blood at baseline as well as every other day until EVD is removed. All patients will have pP and MDA assayed on either a LP or EVD sample on day 7.
- 5- SFN and its metabolites will be measured on day 7 in all patient with paired blood and CSF (LP or EVD sample).
- 6- These assessments will be done on every other day basis with a +/- 1 day window. They will be carried on until discharge or up to when it is clinically required.

### Sample Size

No formal sample size calculation has been carried out; the power associated with a sample size of 90 is based on the following assumptions:

- The error probability for the Type I error should not exceed 5% for a one-sided test;
- The primary endpoint will be compared between treatment groups by means of a t-test
- The mean maximum MCA flow velocity for patients treated with SFX-01 is estimated as 175 cm/s and
- The standard deviation of maximum MCA flow velocity is 50 cm/s

Under these assumptions 90 patients will give 80% power to detect a difference in maximum MCA velocity which is approximately half of the standard deviation of the mean value. The standard deviation was assumed to be approximately 30% of the mean value.

### Recruitment

Patients with SAH who present to the clinical centres and meet the above criteria will be considered for recruitment. The inclusion and exclusion criteria reflect national practice. Patients will be identified by the treating clinical team at the time of referral, admission or daily medical handover.



## 518 **Assignment of intervention**

519

### 520 ***Randomisation and blinding***

521

522 Patients will be randomised in a 1:1 ratio to the active or placebo arm. Randomisation  
523 will be stratified using the most recent World Federation of Neurosurgical Societies  
524 (WFNS) grade [59] prior to randomization. Patients in different WFNS groups will  
525 have significantly different outcomes [60] and imbalance between treatment arms  
526 risks treatment allocation bias.

527

528 All treatment packs will be otherwise identical in appearance. Placebo capsules will  
529 be identical and contain  $\alpha$ -cyclodextrin making the contents indistinguishable should  
530 they be opened either inadvertently or for the purposes of NG administration. Patients  
531 will be randomised to one of the treatment groups by allocation of the appropriate,  
532 sequentially numbered treatment pack from either the clinical trials pharmacy, or a  
533 suitably calibrated and monitored fridge outside the pharmacy. The treatment packs  
534 will be pre-numbered according to a block balanced randomisation code with a ratio  
535 of 1:1 by a blinded third party. They will be selected as per WFNS grading by a  
536 member of a research team from pharmacy.

537

### 538 ***Unblinding***

539

540 The Pharmacy will receive a sealed envelope containing the identity of each trial  
541 medication bottle. An envelope may be opened only in the case of a serious adverse  
542 event and only when it is essential to the subsequent management of the patient. The  
543 decision to unblind will be made in discussion between the treating clinician and PI  
544 and where possible CI. The independent trial centre will be responsible for breaking  
545 codes for regulatory submissions of Suspected Unexpected Serious Adverse  
546 Reactions (SUSARs), thereby maintaining the overall confidentiality of the code  
547 breaks. If the code is broken the data for that patient will be excluded from the Per  
548 Protocol Population analysis but included in the Intention to Treat Analysis. They will  
549 continue in the study and complete the study visits in accordance with the study visit  
550 schedule.

551

## 552 **Data collection and management**

553

554 Data collection will be performed by Good Clinical Practice-trained members of the  
555 research team. Study specific training and additional training in disease specific  
556 questionnaires will be provided. The data will be entered into a secure electronic case  
557 report form.

558

### 559 ***Statistical analysis***

560

561 The following populations will be considered for the analysis:

- 562 • Intention-to-Treat population (ITT): all randomised patients who receive at  
563 least one dose of study medication and with any post-dose efficacy  
564 evaluations. Patients where the time from ictus to admission is unknown are  
565 to be considered as part of the ITT population .

- 1  
2  
3 566
- 4 567 • Per-protocol population (PPP): The Per Protocol Population (for Primary
  - 5 568 analysis) will be considered to be those patients in the ITT population that
  - 6 569 have been dosed for a minimum to day seven post ictus without any major
  - 7 570 protocol violations (i.e. wrong inclusions, etc.).
  - 8 571 • Safety population: all randomised patients who have taken at least one dose of
  - 9 572 study medication.

10 573 Last observation carried forwards (LOCF) will be used to impute missing outcome at  
11 574 6 months. The final full statistical analysis plan will be published prior to unblinding.

### 12 575 13 576 **Monitoring**

14 577  
15 578 A data safety monitoring board (DSMB) has been set-up to monitor the safety aspect  
16 579 of the trial throughout. The DSMB will be independent of the study team and  
17 580 company and has its own charter. A steering committee (consisting of the Chief  
18 581 Investigator and the sponsor's Chief Medical Officer) will receive and review the  
19 582 reports from DSMB, and take action as appropriate.

20 583  
21 584 The first 20 patients will only be dosed as an inpatient and may therefore have courses  
22 585 shorter than 28 days. The DSMB plan to hold an initial meeting after recruitment of  
23 586 20 patients who will have completed seven days of trial medication. If there are no  
24 587 safety concerns, further patients will be allowed to be dosed with the trial drug after  
25 588 discharge to other hospitals or home. The DSMB will also meet if there are any  
26 589 SUSARs or if two patients have had an increase in the grading of the severity of  
27 590 adverse events.

28 591  
29 592 Recruitment will stop once the target has been reached or if DSMB deems the study  
30 593 or trial drug to be associated with a significant number of adverse events compared to  
31 594 the normal patient population. The recruitment target is set to a minimum of 90  
32 595 patients between three centres in the United Kingdom. Up to 120 patients may be  
33 596 recruited in order to allow for withdrawals and deaths.

34 597  
35 598 External monitoring will occur regularly throughout the study and after the study has  
36 599 been completed. At these visits the monitor(s) will inspect various study records; case  
37 600 report forms, investigator site file and source data, provided that subject  
38 601 confidentiality is respected.

### 39 602 40 603 **Adverse events reporting**

41 604  
42 605 All adverse events, adverse drug reactions and serious adverse events (SAE) will be  
43 606 accurately documented. The AEs are graded in both severity and seriousness i.e mild,  
44 607 moderate and severe. Where severe on the severity scale subsequent SAEs will be  
45 608 completed instead, within 24 hours of the research team being informed. At each visit  
46 609 all AEs will be reassessed to ensure no change has occurred from the previous  
47 610 assessment. Monitoring and auditing is done against the original documentation on a  
48 611 six-weekly basis by the external monitor. All AEs are also entered onto an electronic  
49 612 case report form where further external monitoring will be done.

50 613  
51 614 Pregnancies occurring during the study must be reported immediately. In the event it  
52 615 does occur, patients will be referred for close obstetric monitoring. All obstetric visits

1  
2  
3 616 will be monitored closely by the research team and any concerns will be highlighted  
4 617 and addressed accordingly.  
5 618  
6 619

### 620 ***Data Availability***

621  
622 Upon completion of the study, data will be shared with other eligible investigators  
623 through academically established means. The datasets used and/or analysed during the  
624 study will be available from the corresponding author on reasonable request.  
625

## 626 **Ethical considerations and Informed Consent**

### 627 ***Consent procedures and emergency dosing***

628  
629  
630 Most patients with acute SAH present with either severe headache or altered level of  
631 consciousness. Many will lack capacity with no legal representative immediately  
632 available. SAH is an acute emergency and any benefit from SFX-01 is likely to be  
633 greatest the earlier it is administered. The study has therefore been granted ethical  
634 permission to obtain baseline blood testing and administer two doses of trial drug  
635 without consent if the patient is lacking in capacity and no legal representative is  
636 available. If no consent can be obtained at that point, the patient will be withdrawn  
637 from the study.  
638  
639

640 Consent will be obtained in one of three scenarios:

- 641 1- Patients with capacity
- 642 2- Patients without capacity, but with a relative or next of kin available  
643 immediately in person
- 644 3- Patients without capacity and no relative or next of kin immediately available  
645 in person. In this case, a professional legal representative will be approached.  
646

### 647 ***Re-Consent***

648  
649  
650 This must take place in two different scenarios:

- 651 1- When patients regain capacity, they must be re-consented.
- 652 2- When patients have been consented through a professional legal  
653 representative, after which time either they regaine capacity or the next of kin  
654 becomes available.  
655

## 656 **Discussion**

657  
658 There is mounting evidence supporting the role of the Nrf2 pathway in outcome after  
659 SAH. SFN upregulates Nrf2 expression and improves outcome in animal models.  
660 SFX-01 represents an exciting and novel way to deliver SFN to SAH patients with the  
661 potential to improve their lives.  
662

663 This trial will investigate the safety, pharmacokinetics and pharmacodynamics of  
664 SFX-01 after SAH. If successful it may deliver long-term benefit to patients who have

665 suffered SAH and provide new hope to a group of patients characterised by complex  
666 neurocognitive problems and disability.

667

## 668 **Footnotes**

### 669 **Authors' contributions:**

670 DB conceived the trial. AZ, IG and DB were all involved in the design of the study  
671 and its setup. AZ and DB wrote the study protocol. DB managed the recruitment of  
672 other centres. SF, IG and DB reviewed the protocol manuscript and approved the final  
673 version.

674

### 675 **Acknowledgements:**

676 The protocol was revised and finalised in conjunction with David Howatt and Robert  
677 Holland previously at Evgen Pharma. The manuscript was reviewed by Sally Ross  
678 and Thomas Morris of Evgen Pharma.

679

### 680 **Funding:**

681 This study is funded and sponsored by EvgenPharma.

682

### 683 **Competing interests:**

684 Dr Stephen Franklin is the Chief Executive Officer of Evgen Pharma plc. All the  
685 other authors have no financial or non-financial interest in Evgen Pharma plc.

686

687 **Ethical approval:** South Central Research Ethics Committee, Hampshire A, UK.

688 **Word count:** 5220

689

## 690 **References**

691

- 692 1 de Rooij NK, Linn FHH, van der Plas JA, *et al.* Incidence of  
693 subarachnoid haemorrhage: a systematic review with emphasis on  
694 region, age, gender and time trends. *J Neurol Neurosurg Psychiatry*  
695 2007;**78**:1365–72. doi:10.1136/jnnp.2007.117655
- 696 2 Van Gijn J, Rinkel GJE. Subarachnoid haemorrhage: Diagnosis,  
697 causes and management. *Brain*. 2001. doi:10.1093/brain/124.2.249
- 698 3 Nieuwkamp DJ, Setz LE, Algra A, *et al.* Changes in case fatality of  
699 aneurysmal subarachnoid haemorrhage over time, according to age,  
700 sex, and region: a meta-analysis. *Lancet Neurol* 2009;**8**:635–42.  
701 doi:10.1016/S1474-4422(09)70126-7
- 702 4 Kirkpatrick P, Lindsay K, Shaw M, *et al.* *National Study of*  
703 *Subarachnoid Haemorrhage*. 2006.
- 704 5 Rivero-Arias O, Gray A, Wolstenholme J. Burden of disease and  
705 costs of aneurysmal subarachnoid haemorrhage (aSAH) in the  
706 United Kingdom. *Cost Eff Resour Alloc* 2010;**8**:1–12.  
707 doi:10.1186/1478-7547-8-6
- 708 6 Pickard JD, Murray GD, Illingworth R, *et al.* Effect of oral  
709 nimodipine on cerebral infarction and outcome after subarachnoid  
710 haemorrhage : British aneurysm nimodipine trial. *Bmj*

- 1  
2  
3 711 1989;**298**:636–42. doi:10.1136/bmj.298.6674.636
- 4 712 7 Dorhout Mees SM, Rinkel GJ, Feigin VL, *et al.* Calcium  
5 713 antagonists for aneurysmal subarachnoid haemorrhage. *Cochrane*  
6 714 *Database Syst Rev* Published Online First: 2007.  
7 715 doi:10.1002/14651858.CD000277.pub3
- 8 716 8 Zolnourian A, Galea I, Bulters D. Neuroprotective Role of the Nrf2  
9 717 Pathway in Subarachnoid Haemorrhage and Its Therapeutic  
10 718 Potential. *Oxid Med Cell Longev* 2019;**2019**:1–21.  
11 719 doi:10.1155/2019/6218239
- 12 720 9 Dóczy T. The pathogenetic and prognostic significance of blood-  
13 721 brain barrier damage at the acute stage of aneurysmal subarachnoid  
14 722 haemorrhage. Clinical and experimental studies. *Acta Neurochir*  
15 723 *(Wien)* 1985;**77**:110–  
16 724 32.<http://www.ncbi.nlm.nih.gov/pubmed/4072781>
- 17 725 10 László FA, Varga C, Dóczy T. Cerebral oedema after subarachnoid  
18 726 haemorrhage. Pathogenetic significance of vasopressin. *Acta*  
19 727 *Neurochir (Wien)* 1995;**133**:122–  
20 728 33.<http://www.ncbi.nlm.nih.gov/pubmed/8748754>
- 21 729 11 Zetterling M, Hallberg L, Ronne-Engström E. Early global brain  
22 730 oedema in relation to clinical admission parameters and outcome in  
23 731 patients with aneurysmal subarachnoid haemorrhage. *Acta*  
24 732 *Neurochir (Wien)* 2010;**152**:1527–33. doi:10.1007/s00701-010-  
25 733 0684-8
- 26 734 12 Cahill WJ, Calvert JH, Zhang JH. Mechanisms of early brain injury  
27 735 after subarachnoid hemorrhage. *J Cereb Blood Flow Metab*  
28 736 2006;**26**:1341–53. doi:10.1038/sj.jcbfm.9600283
- 29 737 13 Lad SP, Hegen H, Gupta G, *et al.* Proteomic biomarker discovery in  
30 738 cerebrospinal fluid for cerebral vasospasm following subarachnoid  
31 739 hemorrhage. *J Stroke Cerebrovasc Dis* 2012;**21**:30–41.  
32 740 doi:10.1016/j.jstrokecerebrovasdis.2010.04.004
- 33 741 14 Kusaka G, Ishikawa M, Nanda A, *et al.* Signaling pathways for  
34 742 early brain injury after subarachnoid hemorrhage. *J Cereb Blood*  
35 743 *Flow Metab* Published Online First: 2004.  
36 744 doi:10.1097/01.WCB.0000125886.48838.7E
- 37 745 15 Gaetani P, Pasqualin A, Rodriguez y Baena R, *et al.* Oxidative  
38 746 stress in the human brain after subarachnoid hemorrhage. *J*  
39 747 *Neurosurg* Published Online First: 2009.  
40 748 doi:10.3171/jns.1998.89.5.0748
- 41 749 16 Fassbender K, Hodapp B, Rossol S, *et al.* Inflammatory cytokines  
42 750 in subarachnoid haemorrhage: Association with abnormal blood  
43 751 flow velocities in basal cerebral arteries. *J Neurol Neurosurg*  
44 752 *Psychiatry* Published Online First: 2001. doi:10.1136/jnnp.70.4.534
- 45 753 17 Pennings FA, Bouma GJ, Ince C. Direct observation of the human

- 1  
2  
3 754 cerebral microcirculation during aneurysm surgery reveals  
4 755 increased arteriolar contractility. *Stroke* 2004;**35**:1284–8.  
5 756 doi:10.1161/01.STR.0000126039.91400.cb  
6  
7 757 18 Dorsch NWC, King MT. A review of cerebral vasospasm in  
8 758 aneurysmal subarachnoid haemorrhage Part I: Incidence and effects.  
9 759 *J. Clin. Neurosci.* 1994. doi:10.1016/0967-5868(94)90005-1  
10 760 19 Itoh K, Chiba T, Takahashi S, *et al.* An Nrf2/small Maf heterodimer  
11 761 mediates the induction of phase II detoxifying enzyme genes  
12 762 through antioxidant response elements. *Biochem Biophys Res*  
13 763 *Commun* 1997;**236**:313–22. doi:10.1006/bbrc.1997.6943  
14 764 20 Venugopal R, Jaiswal a K. Nrf2 and Nrf1 in association with Jun  
15 765 proteins regulate antioxidant response element-mediated expression  
16 766 and coordinated induction of genes encoding detoxifying enzymes.  
17 767 *Oncogene* 1998;**17**:3145–56. doi:10.1038/sj.onc.1202237  
18 768 21 Itoh K, Ishii T, Wakabayashi N, *et al.* Regulatory mechanisms of  
19 769 cellular response to oxidative stress. *Free Radic Res* 1999;**31**:319–  
20 770 24. doi:10.1080/10715769900300881  
21 771 22 Zhao X, Song S, Sun G, *et al.* Neuroprotective Role of Haptoglobin  
22 772 after Intracerebral Hemorrhage. *J Neurosci* 2009;**29**:15819–27.  
23 773 doi:10.1523/JNEUROSCI.3776-09.2009  
24 774 23 Galea J, Cruickshank G, Teeling JL, *et al.* The intrathecal CD163-  
25 775 haptoglobin-hemoglobin scavenging system in subarachnoid  
26 776 hemorrhage. *J Neurochem* 2012;**121**:785–92. doi:10.1111/j.1471-  
27 777 4159.2012.07716.x  
28 778 24 Kristiansen M, Graversen JH, Jacobsen C, *et al.* Identification of  
29 779 the haemoglobin scavenger receptor. *Nature* 2001;**409**:198–201.  
30 780 doi:10.1038/35051594  
31 781 25 Bulters D, Gaastra B, Zolnourian A, *et al.* Haemoglobin scavenging  
32 782 in intracranial bleeding: biology and clinical implications. *Nat Rev*  
33 783 *Neurol* 2018;**14**:416–32. doi:10.1038/s41582-018-0020-0  
34 784 26 Zhao X, Sun G, Ting SM, *et al.* Cleaning up after ICH: The role of  
35 785 Nrf2 in modulating microglia function and hematoma clearance. *J*  
36 786 *Neurochem* 2015;**133**:144–52. doi:10.1111/jnc.12974  
37 787 27 Morris CM, Candy JM, Edwardson JA, *et al.* Evidence for the  
38 788 localization of haemopexin immunoreactivity in neurones in the  
39 789 human brain. *Neurosci Lett* 1993;**149**:141–4. doi:10.1016/0304-  
40 790 3940(93)90756-B  
41 791 28 Chen M, Regan RF. Time course of increased heme oxygenase  
42 792 activity and expression after experimental intracerebral hemorrhage:  
43 793 Correlation with oxidative injury. *J Neurochem* 2007;**103**:2015–21.  
44 794 doi:10.1111/j.1471-4159.2007.04885.x  
45 795 29 Harada N, Kanayama M, Maruyama A, *et al.* Nrf2 regulates  
46 796 ferroportin 1-mediated iron efflux and counteracts

- 1  
2  
3 797 lipopolysaccharide-induced ferroportin 1 mRNA suppression in  
4 798 macrophages. *Arch Biochem Biophys* 2011;**508**:101–9.  
5 799 doi:10.1016/j.abb.2011.02.001  
6  
7 800 30 Sandberg M, Patil J, D'Angelo B, *et al.* NRF2-regulation in brain  
8 801 health and disease: Implication of cerebral inflammation.  
9 802 *Neuropharmacology* 2014;**79**:298–306.  
10 803 doi:10.1016/j.neuropharm.2013.11.004  
11  
12 804 31 Pan H, Wang H, Zhu L, *et al.* Depletion of Nrf2 enhances  
13 805 inflammation induced by oxyhemoglobin in cultured mice  
14 806 astrocytes. *Neurochem Res* 2011;**36**:2434–41. doi:10.1007/s11064-  
15 807 011-0571-6  
16  
17 808 32 Chen G, Fang Q, Zhang J, *et al.* Role of the Nrf2-ARE pathway in  
18 809 early brain injury after experimental subarachnoid hemorrhage. *J*  
19 810 *Neurosci Res* 2011;**89**:515–23. doi:10.1002/jnr.22577  
20  
21 811 33 Li T, Wang H, Ding Y, *et al.* Genetic elimination of Nrf2  
22 812 aggravates secondary complications except for vasospasm after  
23 813 experimental subarachnoid hemorrhage in mice. *Brain Res*  
24 814 2014;**1558**:90–9. doi:10.1016/j.brainres.2014.02.036  
25  
26 815 34 Zhao XD, Zhou YT, Lu XJ. Sulforaphane enhances the activity of  
27 816 the Nrf2-ARE pathway and attenuates inflammation in OxyHb-  
28 817 induced rat vascular smooth muscle cells. *Inflamm Res*  
29 818 2013;**62**:857–63. doi:10.1007/s00011-013-0641-0  
30  
31 819 35 Zhao X, Wen L, Dong M, *et al.* Sulforaphane activates the cerebral  
32 820 vascular Nrf2–ARE pathway and suppresses inflammation to  
33 821 attenuate cerebral vasospasm in rat with subarachnoid hemorrhage.  
34 822 *Brain Res* 2016;**1653**:1–7. doi:10.1016/j.brainres.2016.09.035  
35  
36 823 36 Farrell B, Godwin J, Richards S, *et al.* The United Kingdom  
37 824 transient ischaemic attack (UK-TIA) aspirin trial: Final results. *J*  
38 825 *Neurol Neurosurg Psychiatry* Published Online First: 1951.  
39 826 doi:10.1136/jnnp.54.12.1044  
40  
41 827 37 Rankin J. Cerebral Vascular Accidents in Patients over the Age of  
42 828 60: III. Diagnosis and Treatment. *Scott Med J* Published Online  
43 829 First: 1957. doi:10.1177/003693305700200604  
44  
45 830 38 Quinn TJ, Dawson J, Walters MR, *et al.* Reliability of the modified  
46 831 rankin scale: A systematic review. *Stroke* Published Online First:  
47 832 2009. doi:10.1161/STROKEAHA.109.557256  
48  
49 833 39 Jennett B, Bond M. ASSESSMENT OF OUTCOME AFTER  
50 834 SEVERE BRAIN DAMAGE. A Practical Scale. *Lancet* Published  
51 835 Online First: 1975. doi:10.1016/S0140-6736(75)92830-5  
52  
53 836 40 Jennett B, Snoek J, Bond MR, *et al.* Disability after severe head  
54 837 injury: Observations on the use of the Glasgow Outcome Scale. *J*  
55 838 *Neurol Neurosurg Psychiatry* Published Online First: 1981.  
56 839 doi:10.1136/jnnp.44.4.285

- 1  
2  
3 840 41 Pace A, Mitchell S, Casselden E, *et al.* A subarachnoid  
4 841 haemorrhage-specific outcome tool. *Brain* 2018;**141**:1111–21.  
5 842 doi:10.1093/brain/awy003  
6  
7 843 42 Powell JH, Beckers K, Greenwood RJ. Measuring progress and  
8 844 outcome in community rehabilitation after brain injury with a new  
9 845 assessment instrument - The BICRO-39 scales. *Arch Phys Med*  
10 846 *Rehabil* Published Online First: 1998. doi:10.1016/S0003-  
11 847 9993(98)90265-9  
12  
13 848 43 van Heugten C, Rasquin S, Winkens I, *et al.* Checklist for cognitive  
14 849 and emotional consequences following stroke (CLCE-24):  
15 850 development, usability and quality of the self-report version. *Clin*  
16 851 *Neurol Neurosurg* 2007;**109**:257–62.  
17 852 doi:10.1016/j.clineuro.2006.10.002  
18  
19 853 44 Al-Tamimi YZ, Bhargava D, Feltbower RG, *et al.* Lumbar drainage  
20 854 of cerebrospinal fluid after aneurysmal subarachnoid hemorrhage: a  
21 855 prospective, randomized, controlled trial (LUMAS). *Stroke*  
22 856 2012;**43**:677–82. doi:10.1161/STROKEAHA.111.625731  
23  
24 857 45 Fisher CM, Kistler JP, Davis JM. Relation of cerebral vasospasm to  
25 858 subarachnoid hemorrhage visualized by computerized tomographic  
26 859 scanning. *Neurosurgery* 1980;**6**:1–  
27 860 9.<http://www.ncbi.nlm.nih.gov/pubmed/7354892>  
28  
29 861 46 Naidech AM, Janjua N, Kreiter KT, *et al.* Predictors and impact of  
30 862 aneurysm rebleeding after subarachnoid hemorrhage. *Arch Neurol*  
31 863 2005;**62**:410–6. doi:10.1001/archneur.62.3.410  
32  
33 864 47 Zhao J, Kobori N, Aronowski J, *et al.* Sulforaphane reduces infarct  
34 865 volume following focal cerebral ischemia in rodents. *Neurosci Lett*  
35 866 2006;**393**:108–12. doi:10.1016/j.neulet.2005.09.065  
36  
37 867 48 Zhao X, Sun G, Zhang J, *et al.* Transcription factor Nrf2 protects  
38 868 the brain from damage produced by intracerebral hemorrhage.  
39 869 *Stroke* 2007;**38**:3280–6. doi:10.1161/STROKEAHA.107.486506  
40  
41 870 49 Alfieri A, Srivastava S, Siow RCM, *et al.* Sulforaphane  
42 871 preconditioning of the Nrf2/HO-1 defense pathway protects the  
43 872 cerebral vasculature against blood-brain barrier disruption and  
44 873 neurological deficits in stroke. *Free Radic Biol Med* 2013;**65**:1012–  
45 874 22. doi:10.1016/j.freeradbiomed.2013.08.190  
46  
47 875 50 Sharma V, McNeill JH. To scale or not to scale: The principles of  
48 876 dose extrapolation. *Br. J. Pharmacol.* 2009. doi:10.1111/j.1476-  
49 877 5381.2009.00267.x  
50  
51 878 51 Reagan-Shaw S, Nihal M, Ahmad N. Dose translation from animal  
52 879 to human studies revisited. *FASEB J* Published Online First: 2007.  
53 880 doi:10.1096/fj.07-9574LSF  
54  
55 881 52 Clarke JD, Hsu A, Williams DE, *et al.* Metabolism and tissue  
56 882 distribution of sulforaphane in Nrf2 knockout and wild-type mice.



- 1  
2  
3 883 *Pharm Res* 2011;**28**:3171–9. doi:10.1007/s11095-011-0500-z
- 4 884 53 Jazwa A, Rojo AI, Innamorato NG, *et al.* Pharmacological  
5 885 Targeting of the Transcription Factor Nrf2 at the Basal Ganglia  
6 886 Provides Disease Modifying Therapy for Experimental  
7 887 Parkinsonism. *Antioxid Redox Signal* 2011;**14**:2347–60.  
8 888 doi:10.1089/ars.2010.3731
- 9 889 54 Kumar G, Shahripour RB, Harrigan MR. Vasospasm on transcranial  
10 890 Doppler is predictive of delayed cerebral ischemia in aneurysmal  
11 891 subarachnoid hemorrhage: a systematic review and meta-analysis.  
12 892 2016;**124**:1257–64. doi:10.3171/2015.4.JNS15428.
- 13 893 55 Tam AKH, Ilodigwe D, Li Z, *et al.* Global cerebral atrophy after  
14 894 subarachnoid hemorrhage: a possible marker of acute brain injury  
15 895 and assessment of its impact on outcome. *Acta Neurochir Suppl*  
16 896 Published Online First: 2013. doi:10.1007/978-3-7091-1192-5\_5
- 17 897 56 Nicci Campbell, Carl Verschuur, Sophie Mitchell, Orlaith  
18 898 McCaffrey, Lewis Deane, Hannah Taylor, Rory Smith, Lesley  
19 899 Foulkes, James Glazier, Angela Darekar, Mark E Haacke, Diederik  
20 900 Bulters and IG. Hearing impairment after subarachnoid  
21 901 haemorrhage. *Ann Clin Transl Neurol* 2018;**In press**.  
22 902 doi:10.1002/acn3.714
- 23 903 57 Vergouwen MDI, Vermeulen M, van Gijn J, *et al.* Definition of  
24 904 delayed cerebral ischemia after aneurysmal subarachnoid  
25 905 hemorrhage as an outcome event in clinical trials and observational  
26 906 studies: proposal of a multidisciplinary research group. *Stroke*  
27 907 2010;**41**:2391–5. doi:10.1161/STROKEAHA.110.589275
- 28 908 58 Alaraj A, Hussein AE, Esfahani DR, *et al.* Reducing length of stay  
29 909 in aneurysmal subarachnoid hemorrhage: A three year institutional  
30 910 experience. *J Clin Neurosci* 2017;**42**:66–70.  
31 911 doi:10.1016/j.jocn.2017.03.049
- 32 912 59 Teasdale GM, Drake CG, Hunt W, *et al.* A universal subarachnoid  
33 913 haemorrhage scale: report of a committee of the world federation of  
34 914 Neurosurgical societies. *J. Neurol. Neurosurg. Psychiatry*. 1988.  
35 915 doi:10.1136/jnnp.51.11.1457
- 36 916 60 Jaja BNR, Saposnik G, Lingsma HF, *et al.* Development and  
37 917 validation of outcome prediction models for aneurysmal  
38 918 subarachnoid haemorrhage: The SAHIT multinational cohort study.  
39 919 *BMJ* Published Online First: 2018. doi:10.1136/bmj.j5745
- 40 920
- 41  
42  
43  
44  
45  
46  
47  
48  
49  
50  
51  
52  
53  
54  
55  
56  
57  
58  
59  
60

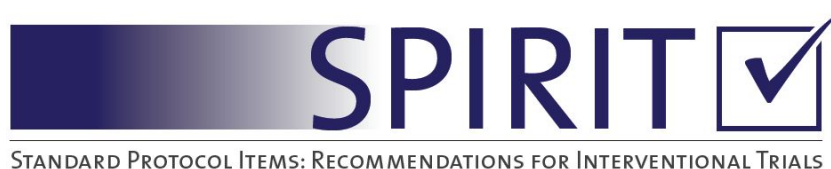

SPIRIT 2013 Checklist: Recommended items to address in a clinical trial protocol and related documents\*

| Section/item                      | Page No.   | Description                                                                                                                                                                                                                                                                              |
|-----------------------------------|------------|------------------------------------------------------------------------------------------------------------------------------------------------------------------------------------------------------------------------------------------------------------------------------------------|
| <b>Administrative information</b> |            |                                                                                                                                                                                                                                                                                          |
| Title                             | 1          | Descriptive title identifying the study design, population, interventions, and, if applicable, trial acronym                                                                                                                                                                             |
| Trial registration                | 2          | Trial identifier and registry name. If not yet registered, name of intended registry                                                                                                                                                                                                     |
|                                   | 2          | All items from the World Health Organization Trial Registration Data Set                                                                                                                                                                                                                 |
| Protocol version                  | 1          | Date and version identifier                                                                                                                                                                                                                                                              |
| Funding                           | 15         | Sources and types of financial, material, and other support                                                                                                                                                                                                                              |
| Roles and responsibilities        | 1          | Names, affiliations, and roles of protocol contributors                                                                                                                                                                                                                                  |
|                                   | 1,15       | Name and contact information for the trial sponsor                                                                                                                                                                                                                                       |
|                                   | 15         | Role of study sponsor and funders, if any, in study design; collection, management, analysis, and interpretation of data; writing of the report; and the decision to submit the report for publication, including whether they will have ultimate authority over any of these activities |
|                                   | 13, 14, 15 | Composition, roles, and responsibilities of the coordinating centre, steering committee, endpoint adjudication committee, data management team, and other individuals or groups overseeing the trial, if applicable (see Item 21a for data monitoring committee)                         |
| <b>Introduction</b>               |            |                                                                                                                                                                                                                                                                                          |
| Background and rationale          | 3,4        | Description of research question and justification for undertaking the trial, including summary of relevant studies (published and unpublished) examining benefits and harms for each intervention                                                                                       |
|                                   | 4          | Explanation for choice of comparators                                                                                                                                                                                                                                                    |
| Objectives                        | 4,5        | Specific objectives or hypotheses                                                                                                                                                                                                                                                        |
| Trial design                      | 4,5        | Description of trial design including type of trial (eg, parallel group, crossover, factorial, single group), allocation ratio, and framework (eg, superiority, equivalence, noninferiority, exploratory)                                                                                |

## Methods: Participants, interventions, and outcomes

|                      |        |                                                                                                                                                                                                                                                                                                                                                                                |
|----------------------|--------|--------------------------------------------------------------------------------------------------------------------------------------------------------------------------------------------------------------------------------------------------------------------------------------------------------------------------------------------------------------------------------|
| Study setting        | 6      | Description of study settings (eg, community clinic, academic hospital) and list of countries where data will be collected. Reference to where list of study sites can be obtained                                                                                                                                                                                             |
| Eligibility criteria | 6,7    | Inclusion and exclusion criteria for participants. If applicable, eligibility criteria for study centres and individuals who will perform the interventions (eg, surgeons, psychotherapists)                                                                                                                                                                                   |
| Interventions        | 7,8    | Interventions for each group with sufficient detail to allow replication, including how and when they will be administered                                                                                                                                                                                                                                                     |
|                      | 8      | Criteria for discontinuing or modifying allocated interventions for a given trial participant (eg, drug dose change in response to harms, participant request, or improving/worsening disease)                                                                                                                                                                                 |
|                      | 8      | Strategies to improve adherence to intervention protocols, and any procedures for monitoring adherence (eg, drug tablet return, laboratory tests)                                                                                                                                                                                                                              |
|                      | 8      | Relevant concomitant care and interventions that are permitted or prohibited during the trial                                                                                                                                                                                                                                                                                  |
| Outcomes             | 8,9,10 | Primary, secondary, and other outcomes, including the specific measurement variable (eg, systolic blood pressure), analysis metric (eg, change from baseline, final value, time to event), method of aggregation (eg, median, proportion), and time point for each outcome. Explanation of the clinical relevance of chosen efficacy and harm outcomes is strongly recommended |
| Participant timeline | 10,11  | Time schedule of enrolment, interventions (including any run-ins and washouts), assessments, and visits for participants. A schematic diagram is highly recommended (see Figure)                                                                                                                                                                                               |
| Sample size          | 11     | Estimated number of participants needed to achieve study objectives and how it was determined, including clinical and statistical assumptions supporting any sample size calculations                                                                                                                                                                                          |
| Recruitment          | 11     | Strategies for achieving adequate participant enrolment to reach target sample size                                                                                                                                                                                                                                                                                            |

## Methods: Assignment of interventions (for controlled trials)

### Allocation:

|                     |    |                                                                                                                                                                                                                                                                                                                                                          |
|---------------------|----|----------------------------------------------------------------------------------------------------------------------------------------------------------------------------------------------------------------------------------------------------------------------------------------------------------------------------------------------------------|
| Sequence generation | 12 | Method of generating the allocation sequence (eg, computer-generated random numbers), and list of any factors for stratification. To reduce predictability of a random sequence, details of any planned restriction (eg, blocking) should be provided in a separate document that is unavailable to those who enrol participants or assign interventions |
|---------------------|----|----------------------------------------------------------------------------------------------------------------------------------------------------------------------------------------------------------------------------------------------------------------------------------------------------------------------------------------------------------|

|    |                |    |                                                                         |
|----|----------------|----|-------------------------------------------------------------------------|
| 1  |                |    |                                                                         |
| 2  | Allocation     | 12 | Mechanism of implementing the allocation sequence (eg, central          |
| 3  | concealment    |    | telephone; sequentially numbered, opaque, sealed envelopes),            |
| 4  | mechanism      |    | describing any steps to conceal the sequence until interventions are    |
| 5  |                |    | assigned                                                                |
| 6  |                |    |                                                                         |
| 7  | Implementation | 12 | Who will generate the allocation sequence, who will enrol participants, |
| 8  |                |    | and who will assign participants to interventions                       |
| 9  |                |    |                                                                         |
| 10 | Blinding       | 12 | Who will be blinded after assignment to interventions (eg, trial        |
| 11 | (masking)      |    | participants, care providers, outcome assessors, data analysts), and    |
| 12 |                |    | how                                                                     |
| 13 |                |    |                                                                         |
| 14 |                |    |                                                                         |
| 15 |                | 12 | If blinded, circumstances under which unblinding is permissible, and    |
| 16 |                |    | procedure for revealing a participant's allocated intervention during   |
| 17 |                |    | the trial                                                               |
| 18 |                |    |                                                                         |

### Methods: Data collection, management, and analysis

|    |                 |     |                                                                          |
|----|-----------------|-----|--------------------------------------------------------------------------|
| 21 | Data collection | 12  | Plans for assessment and collection of outcome, baseline, and other      |
| 22 | methods         |     | trial data, including any related processes to promote data quality (eg, |
| 23 |                 |     | duplicate measurements, training of assessors) and a description of      |
| 24 |                 |     | study instruments (eg, questionnaires, laboratory tests) along with      |
| 25 |                 |     | their reliability and validity, if known. Reference to where data        |
| 26 |                 |     | collection forms can be found, if not in the protocol                    |
| 27 |                 |     |                                                                          |
| 28 |                 |     |                                                                          |
| 29 |                 |     |                                                                          |
| 30 |                 | N/A | Plans to promote participant retention and complete follow-up,           |
| 31 |                 |     | including list of any outcome data to be collected for participants who  |
| 32 |                 |     | discontinue or deviate from intervention protocols                       |
| 33 |                 |     |                                                                          |
| 34 | Data            | 13  | Plans for data entry, coding, security, and storage, including any       |
| 35 | management      |     | related processes to promote data quality (eg, double data entry;        |
| 36 |                 |     | range checks for data values). Reference to where details of data        |
| 37 |                 |     | management procedures can be found, if not in the protocol               |
| 38 |                 |     |                                                                          |
| 39 |                 |     |                                                                          |
| 40 | Statistical     | 12, | Statistical methods for analysing primary and secondary outcomes.        |
| 41 | methods         | 13  | Reference to where other details of the statistical analysis plan can be |
| 42 |                 |     | found, if not in the protocol                                            |
| 43 |                 |     |                                                                          |
| 44 |                 | 12  | Methods for any additional analyses (eg, subgroup and adjusted           |
| 45 |                 |     | analyses)                                                                |
| 46 |                 |     |                                                                          |
| 47 |                 | 13  | Definition of analysis population relating to protocol non-adherence     |
| 48 |                 |     | (eg, as randomised analysis), and any statistical methods to handle      |
| 49 |                 |     | missing data (eg, multiple imputation)                                   |
| 50 |                 |     |                                                                          |
| 51 |                 |     |                                                                          |

### Methods: Monitoring

|    |                 |    |                                                                      |
|----|-----------------|----|----------------------------------------------------------------------|
| 54 | Data monitoring | 13 | Composition of data monitoring committee (DMC); summary of its role  |
| 55 |                 |    | and reporting structure; statement of whether it is independent from |
| 56 |                 |    | the sponsor and competing interests; and reference to where further  |
| 57 |                 |    | details about its charter can be found, if not in the protocol.      |
| 58 |                 |    | Alternatively, an explanation of why a DMC is not needed             |
| 59 |                 |    |                                                                      |
| 60 |                 |    |                                                                      |

|    |          |     |                                                                        |
|----|----------|-----|------------------------------------------------------------------------|
| 1  |          |     |                                                                        |
| 2  |          | 13  | Description of any interim analyses and stopping guidelines, including |
| 3  |          |     | who will have access to these interim results and make the final       |
| 4  |          |     | decision to terminate the trial                                        |
| 5  |          |     |                                                                        |
| 6  | Harms    | 13, | Plans for collecting, assessing, reporting, and managing solicited and |
| 7  |          | 14  | spontaneously reported adverse events and other unintended effects     |
| 8  |          |     | of trial interventions or trial conduct                                |
| 9  |          |     |                                                                        |
| 10 | Auditing | 13, | Frequency and procedures for auditing trial conduct, if any, and       |
| 11 |          | 14  | whether the process will be independent from investigators and the     |
| 12 |          |     | sponsor                                                                |
| 13 |          |     |                                                                        |
| 14 |          |     |                                                                        |

### Ethics and dissemination

|    |                   |     |                                                                               |
|----|-------------------|-----|-------------------------------------------------------------------------------|
| 15 |                   |     |                                                                               |
| 16 |                   |     |                                                                               |
| 17 | Research ethics   | 2   | Plans for seeking research ethics committee/institutional review board        |
| 18 | approval          |     | (REC/IRB) approval                                                            |
| 19 |                   |     |                                                                               |
| 20 | Protocol          | 2   | Plans for communicating important protocol modifications (eg,                 |
| 21 | amendments        |     | changes to eligibility criteria, outcomes, analyses) to relevant parties      |
| 22 |                   |     | (eg, investigators, REC/IRBs, trial participants, trial registries, journals, |
| 23 |                   |     | regulators)                                                                   |
| 24 |                   |     |                                                                               |
| 25 |                   |     |                                                                               |
| 26 | Consent or assent | 14  | Who will obtain informed consent or assent from potential trial               |
| 27 |                   |     | participants or authorised surrogates, and how (see Item 32)                  |
| 28 |                   |     |                                                                               |
| 29 |                   | 14  | Additional consent provisions for collection and use of participant data      |
| 30 |                   |     | and biological specimens in ancillary studies, if applicable                  |
| 31 |                   |     |                                                                               |
| 32 | Confidentiality   | 12  | How personal information about potential and enrolled participants will       |
| 33 |                   |     | be collected, shared, and maintained in order to protect confidentiality      |
| 34 |                   |     | before, during, and after the trial                                           |
| 35 |                   |     |                                                                               |
| 36 |                   |     |                                                                               |
| 37 | Declaration of    | 15  | Financial and other competing interests for principal investigators for       |
| 38 | interests         |     | the overall trial and each study site                                         |
| 39 |                   |     |                                                                               |
| 40 | Access to data    | 15  | Statement of who will have access to the final trial dataset, and             |
| 41 |                   |     | disclosure of contractual agreements that limit such access for               |
| 42 |                   |     | investigators                                                                 |
| 43 |                   |     |                                                                               |
| 44 |                   |     |                                                                               |
| 45 | Ancillary and     | 14  | Provisions, if any, for ancillary and post-trial care, and for                |
| 46 | post-trial care   |     | compensation to those who suffer harm from trial participation                |
| 47 |                   |     |                                                                               |
| 48 | Dissemination     | 2   | Plans for investigators and sponsor to communicate trial results to           |
| 49 | policy            |     | participants, healthcare professionals, the public, and other relevant        |
| 50 |                   |     | groups (eg, via publication, reporting in results databases, or other         |
| 51 |                   |     | data sharing arrangements), including any publication restrictions            |
| 52 |                   |     |                                                                               |
| 53 |                   | 15  | Authorship eligibility guidelines and any intended use of professional        |
| 54 |                   |     | writers                                                                       |
| 55 |                   |     |                                                                               |
| 56 |                   | N/A | Plans, if any, for granting public access to the full protocol, participant-  |
| 57 |                   |     | level dataset, and statistical code                                           |
| 58 |                   |     |                                                                               |
| 59 |                   |     |                                                                               |
| 60 |                   |     |                                                                               |

**Appendices N/A**

|                            |                                                                                                                                                                                                |
|----------------------------|------------------------------------------------------------------------------------------------------------------------------------------------------------------------------------------------|
| Informed consent materials | Model consent form and other related documentation given to participants and authorised surrogates                                                                                             |
| Biological specimens       | Plans for collection, laboratory evaluation, and storage of biological specimens for genetic or molecular analysis in the current trial and for future use in ancillary studies, if applicable |

---

\*It is strongly recommended that this checklist be read in conjunction with the SPIRIT 2013 Explanation & Elaboration for important clarification on the items. Amendments to the protocol should be tracked and dated. The SPIRIT checklist is copyrighted by the SPIRIT Group under the Creative Commons "[Attribution-NonCommercial-NoDerivs 3.0 Unported](#)" license.

For peer review only
